# Supplementary material for: Modelling the historical and future evolution of multiple ice masses in the western Tien Shan, Central Asia, using a 3D ice-flow model
Source: Copernicus journal article supplement (doi:10.5194/egusphere-2022-1441), 2023-02-17

# Modelling the historical and future evolution of six ice masses in the Tien Shan, Central Asia, using a 3D ice-flow model

Lander Van Tricht<sup>1,\*</sup>, Philippe Huybrechts<sup>1</sup>

<sup>1</sup>Earth System Science & Departement Geografie, Vrije Universiteit Brussel, Brussels, Belgium

Correspondence to: Lander Van Tricht (lander.van.tricht@vub.be)

**Abstract.** In the Tien Shan, few modelling studies exist that examine in detail how individual ice bodies are responding to climate change. Nonetheless, earlier research demonstrated that the glacier response to climate change in this mountain range is heterogeneous. Here, we use several measurements and reconstructions of the ice thickness, surface elevation, surface mass balance and ice temperature to model in-depth six different ice bodies in the Kyrgyz Tien Shan: five valley glaciers and one ice cap. The selected ice masses are located in different sub-regions of the Tien Shan with different climatic and topographic settings, and they are all characterised by detailed recent glaciological measurements. A 3-dimensional higher-order thermomechanical ice-flow model is calibrated and applied to simulate the evolution of the ice masses since the end of the Little Ice Age (1850) and to make a prognosis of the future evolution up to 2100 under different CMIP6 SSP climate scenarios. The results reveal a strong retreat of most of the ice masses under all climate scenarios, albeit with notable variations in both timing and magnitude. These can be related to the specific climate regime of each of the ice bodies and their geometry. Under a moderate warming scenario, the ice masses characterised by a limited elevation range undergo complete disappearance, whereas the glaciers with a larger elevation range manage to preserve some ice at the highest altitudes. Additionally, our findings indicate that glaciers that primarily receive precipitation during the late spring and summer months exhibit a more rapid retreat in response to climate change, while the glaciers experiencing higher precipitation levels or more winter precipitation remain for a longer duration. Projections concerning the overall glacier runoff reveal that the maximum water discharge from the ice masses is expected to occur around or prior to the middle of the 21st century, and that the magnitude of this peak is contingent upon the climate scenario, with a higher warming scenario resulting in a higher peak.

## 1 Introduction

The Tien Shan is one of the largest mountain systems in Asia, stretching over 3000 km from west to east. The mountain range is, despite its rather low amount of precipitation, heavily glaciated with one of the greatest concentrations of glaciers and ice caps on Earth (Aizen et al., 2006). Projection of the future extent and volume of ice masses in the Tien Shan is of major interest. Due to the aridity of the area and the surrounding region, glacial meltwater accounts for a significant proportion of the water supply, especially during dry periods in spring and summer, when water sources such as snow melt have been depleted and precipitation is absent (Immerzeel et al., 2010; Sorg et al., 2012; Farinotti et al., 2015; Pritchard, 2019). The meltwater is typically used for drinking, in industry, for hydropower, and for irrigation. Glaciers and ice caps in the Tien Shan are therefore essential for the streamflow regimes of rivers draining to the populated arid lowlands of Kyrgyzstan, Kazakhstan, Uzbekistan, Turkmenistan and the Chinese Xinjiang province. A decrease of meltwater in the future will inevitably lead to water deficits and water scarcity (Sorg et al., 2012; Huss and Hock, 2018). Another subject for which a future prognosis of the ice volume is important concerns the assessment of the danger of rapid drainages from (pro)glacial lakes and more frequent flow and debris flood events due to more extreme runoff in spring (Hagg et al., 2006; Sorg et al., 2012; Narama et al., 2018; Compagno et al., 2022). As in many other mountain areas in the world, glaciers in the Tien Shan mountains have retreated significantly since the end of the Little Ice Age (LIA), ca. 1850, and especially since the seventies (Solomina et al., 2004; Immerzeel et al., 2010; Farinotti et al., 2015; Kraaijenbrink et al., 2017; Shaghedanova et al., 2020; Compagno et al., 2022). However, previous

heeft verwijderd: western

heeft verwijderd: High Mountain Asia (HMA) contains the largest concentration of glaciers outside the polar regions. These glaciers play an essential role in terms of water supply for the surrounding densely populated dry lowland areas. The retreat of glaciers and ice caps in this region can consequently have a major impact on societies. However,

heeft verwijderd: in the area

heeft verwijderd: Further, different climatic and topographic settings ensure a heterogenous impact of climate change on ice masses in the area. In this study

heeft verwijderd: we focus on the western and central part of the Tien Shan Mountain range in the northwest of HMA. We

heeft verwijderd: study

heeft verwijderd: detail

heeft verwijderd: ice bodies

heeft verwijderd: Further, projections of the total runoff of the ice masses are calculated.

heeft verwijderd: of this study

heeft verwijderd: however with important differences

heeft verwijderd: It is highlighted that because the main precipitation occurs in spring and early summer, the ice masses respond to climate change with an accelerating retreat.

heeft verwijderd: for

heeft verwijderd: The aridity in the area and the surrounding regions ensures that during the dry periods in spring and summer, when water sources such as snow melt have been depleted and precipitation is absent, glacial meltwater accounts for a significant proportion of the water supply

heeft verwijderd:

heeft verwijderd: 1

research of glacier responses showed a non-uniform pattern in the area (Hoelzle et al., 2019; Barandun et al., 2021; Barandun and Pohl, 2023). This stimulates conducting detailed studies on individual glaciers to understand their response to climate change and to determine the reasons behind this disparity.

In this study, we model the future evolution of five glaciers and one ice cap (flat top glacier) under different CMIP6 SSP climate scenarios using a 3-dimensional higher-order thermomechanical ice-flow model. The selected model has already been applied to different ice masses ranging from mountain glaciers (Zekollari et al., 2014; Van Tricht and Huybrechts, 2022) to ice caps (Zekollari et al., 2017) and an entire ice sheet (Fürst et al., 2011, 2013). The six different ice bodies are located in different sub-regions of the western Tien Shan with different climatic and topographic settings, and they are all characterised by recent glaciological measurements which are used for calibration and validation (Hoelzle et al., 2017; Satylkanov, 2018; Van Tricht et al., 2021a; Van Tricht and Huybrechts, 2022). First, a historical reconstruction is made to correctly capture the past evolution because today's ice masses are still reacting to past climatic conditions (Christian et al., 2018). Hence the ice-flow model is dynamically calibrated with temperature and precipitation observations since the end of the LIA. Then, from 2022 onwards, the different climate scenarios with data up to 2100 are imposed and the evolution of the ice masses is studied in detail. Projections of the total runoff are made for each ice mass.

## 2 Location and climate

### 2.1 Selected ice masses

The selection of the six ice masses is based on several factors, including the availability of detailed measurements necessary for model application, such as ice thickness and mass balance, the proximity of several meteorological stations to the ice masses, the distribution of the ice masses across four subregions of the Kyrgyz Tien Shan, and their inclusion in ongoing monitoring programs. Additionally, our chosen sample encompasses a diverse range of ice mass types, including an ice cap, thin and thick glaciers, polythermal, cold and temperate glaciers, thereby enabling us to make comparisons between the various findings.

Five out of six of the ice masses are situated in the Inner Tien Shan. The first of them is the Kara-Batkak glacier (42.15°N, 78.27°E), which is located at the northern slopes of the Terskey Ala-Too mountain range south of Lake Issyk-Kul. Van Tricht et al. (2021a) measured and reconstructed the ice thickness showing a maximum of 113 m and they determined the glacier volume to be about 0.10 km<sup>3</sup> in 2017. The Kara-Batkak glacier is characterised by a large altitudinal range of 1300 m spanning between 3300 and 4600 m a.s.l. (Table 1). The Kara-Batkak glacier is also one of the few glaciers in the area with a relatively large amount of data with a mass balance series dating back to 1957. The surface mass balance measurements continued up to 1998. In 2013, the measurements were reinitiated as part of the CHARIS Project (Contribution to High Asian runoff from Ice and Snow) and they are carried out annually by the Tien Shan High Mountain Scientific Research Centre (TSHMSRC) (Satylkanov, 2018).

The second and third of the ice masses are positioned on the southern slopes of the Terskey Ala-Too mountain range, in the Arabel Plateau highland area, south of Lake Issyk-Kul. The Ashu-Tor glacier (42.05°N, 78.17°E) is a south-facing glacier. The ice thickness of the Ashu-Tor glacier has been measured and reconstructed in 2019, showing maximum thicknesses up to more than 200 m with a volume of about 0.43 km<sup>3</sup> (Van Tricht et al., 2021a). The glacier has a limited altitudinal range of only 600 metres between 3900 and 4500 m a.s.l. (Table 1). Surface mass balance (SMB) measurements were performed for a short period of time (2014-2019) on the lowest 200 m of the glacier. These measurements are used to calibrate the mass balance model (see section 3.2). The other selected ice mass in the Terskey Ala-Too range is the Grigoriev ice cap (41.96°N, 77.91°E).

**heeft verwijderd:** For example, glacier shrinkage appeared to be less severe in the continental inner ranges than in the more humid outer ranges because mass turnover of these more continental glaciers is smaller (Sorg et al., 2012). Further, in some areas, heterogeneously changing precipitation rates led to diverging melt rates. Another reason for the non-uniform response is the presence or absence of a debris cover insulating the ice below and shielding it from intense solar irradiance.

**heeft verwijderd:** e variety of responses to climate change complicates general statements about the future evolution of glaciers in the Tien Shan and

**heeft verwijderd:** to understand the importance of different processes.

**heeft verwijderd:** successfully

**heeft verwijderd:** .

**heeft opmaak toegepast:** Lettertype: (Standaard)  
+Hoofddektst (Times New Roman)

**heeft opmaak toegepast:** Lettertype: (Standaard)  
+Hoofddektst (Times New Roman)

**heeft opmaak toegepast:** Lettertype: (Standaard)  
+Hoofddektst (Times New Roman)

**heeft opmaak toegepast:** Lettertype: (Standaard)  
+Hoofddektst (Times New Roman)

**heeft verwijderd:** Golubin glacier (42.46°N, 74.47°E) is situated approximately 500 km to the west of the 4 previous ice masses. More specifically, this glacier is located in the Ala-Archa catchment in the Kyrgyz Ala-too range in the north-western Tien Shan. In 2019, the glacier covered an area of 4.6 km<sup>2</sup> with a volume of about 0.30 km<sup>3</sup> (Van Tricht et al., 2021a). The maximum measured ice thickness was 154 m (Table 1). Glaciological investigations on the Golubin glacier started in 1958 and continued until 1994. In 2010, mass balance measurements were re-initiated in the framework of the Capacity Building and Twinning for Climate Observing Systems (CATCOS) and Central Asia Water (CAWa) projects, and they continue today (Hoelzle et al., 2017). For unmeasured years, the mass balance has been reconstructed using a temperature index model and snowline observations (Barandun et al., 2018; Azisov et al., 2022), showing a steepening of the ablation and accumulation gradients in the past two decades. Nowadays, the glacier front is located at about 3400 m a.s.l. while the upper areas reach elevation of about 4300 m a.s.l., meaning that the glacier consists of an elevation range of 900 m (Table 1).

**heeft opmaak toegepast:** Lettertype: 10 pt, Engels (V.S.)

**heeft verwijderd:** The

**heeft verwijderd:** is a small reference glacier in the Inner Tien Shan. The Kara-Batkak glacier

**heeft verwijderd:** is

**heeft verwijderd:** M

**heeft verwijderd:** /Ice and snow contribution to the flow of High Asia

**heeft verwijderd:** Van Tricht et al. (2021a) measured and reconstructed the ice thickness showing a maximum of 113 m and they determined the glacier volume to be about 0.10 km<sup>3</sup> in 2017. The Kara-Batkak glacier is characterised by a large altitudinal range of 1300 m (Table 1).

**heeft verwijderd:** is positioned on the southern slopes of the Terskey Ala-Too Mountain range, south of Lake Issyk-Kul. This

**heeft verwijderd:** is situated in the Arabel Plateau highland area

**heeft verwijderd:** . The measurements

**heeft verwijderd:** ed

**heeft verwijderd:** is

a small ice cap (also called flat top glacier). The more or less circular ice cap is located at a high altitude, primarily between 4200 and 4600 m. The ice thickness of the ice cap was measured in 2021 by Van Tricht and Huybrechts (2022) who showed a maximum thickness of 114 m and a volume of about 0.39 km<sup>3</sup> (Table 1). The surface mass balance has been measured and reconstructed for different time periods (Mikhaleenko, 1989; Dyurgerov, 2002; Arkhipov et al., 2004; Fujita et al., 2011). These measurements are used for calibration of the mass balance model. Several deep ice cores were made in the past measuring the ice temperature of the ice cap (Dikikh, 1965; Thompson et al., 1993; Arkhipov et al., 2004; Takeuchi et al., 2014). These measurements were used to calibrate and model the thermal regime of the ice cap, which showed that the Grigoriev ice cap consists of cold ice except for a thin layer at the contact between the ice and the bedrock over the central part which might be characterised by a layer of temperate ice (Van Tricht and Huybrechts, 2022).

The fourth and fifth selected glaciers are the Bordu (41.81°N, 78.17°E) and Sary-Tor (41.83°N, 78.18°E) glaciers, which are located in valleys next to each other at the north-western side of the Ak-Shyirak massive. Both glaciers are situated at the southern edge of the Arabel Plateau highland area. The ice thickness of the Bordu glacier was measured in 2017 and 2019 revealing a maximum thickness of 148 m and an ice volume of about 0.33 km<sup>3</sup> (Van Tricht et al., 2021a). The ice thickness of the Sary-Tor glacier was measured in 2013 and showed a maximum ice thickness of 159 m and a volume of ca. 0.15 km<sup>3</sup> (Petrakov et al., 2014) (Table 1). Both glaciers have a comparable elevation range of 800 m (Bordu glacier) and 900 m (Sary-Tor glacier) respectively. On both glaciers, surface mass balance measurements are carried out annually (since 2014) by the TSHMSRC as part of the CHARIS project (Satykanov, 2018), which are also submitted to the World Glacier Monitoring Service (WGMS). The Sary-Tor glacier was also shown to be a polythermal glacier with a large part of temperate ice over the bed. This was proven by both measurements and modelling (Petrakov et al., 2014; Van Tricht and Huybrechts, 2022).

The last selected glacier is the Golubin glacier (42.46°N, 74.47°E), which is situated approximately 500 km to the west of the five other glaciers. More specifically, this glacier is located in the Ala-Archa catchment in the Kyrgyz Ala-too range in the north-western Tien Shan. In 2019, the glacier covered an area of 4.6 km<sup>2</sup> with a volume of about 0.30 km<sup>3</sup> (Van Tricht et al., 2021a). The maximum measured ice thickness was 154 m (Table 1). Nowadays, the glacier front is located at about 3400 m a.s.l. while the upper areas reach elevations of about 4300 m a.s.l., meaning that the glacier currently consists of an elevation range of 900 m (Table 1). Glaciological investigations on the Golubin glacier started in 1958 and continued until 1994. In 2010, mass balance measurements were re-initiated in the framework of the Capacity Building and Twinning for Climate Observing Systems (CATCOS) and Central Asia Water (CAWA) projects, and they continue today (Hoelzle et al., 2017).

heeft verwijderd: situated at approximately 30 km to the northwest of the Bordu and Sary Tor glaciers

heeft verwijderd: cap

heeft verwijderd: T

heeft verwijderd:

heeft verwijderd: are

heeft verwijderd: On both glaciers, surface mass balance measurements are carried out annually by the Tien Shan High Mountain Scientific Research Centre as part of the CHARIS project (Contribution to High Asian runoff from Ice and Snow/Ice and snow contribution to the flow of High Asia) (Satykanov, 2018), which are also submitted to the World Glacier Monitoring Service (WGMS).

heeft verwijderd: the measurements

heeft verwijderd: Tien Shan High Mountain Scientific Research Centre

heeft verwijderd: (Contribution to High Asian runoff from Ice and Snow/Ice and snow contribution to the flow of High Asia)

heeft verwijderd: The specific thermal structure could be explained by the release of heat through the refreezing of meltwater in the accumulation area, and due to the insulation of snow during the winter months.

Table 1. Overview of the main characteristics of the selected ice masses. The length of the Grigoriev ice cap corresponds to the length of the largest cross section.

|                            | Ashu-Tor       | Bordu          | Golubin                     | Grigoriev      | Kara-Batkak               | Sary-Tor       |
|----------------------------|----------------|----------------|-----------------------------|----------------|---------------------------|----------------|
| Length (km)                | 4.81<br>(2021) | 4.24<br>(2021) | 4.95<br>(2019)              | 4.53<br>(2021) | 3.46<br>(2021)            | 3.83<br>(2021) |
| Area (km <sup>2</sup> )    | 4.76<br>(2019) | 4.89<br>(2017) | 4.64<br>(2019)              | 7.55<br>(2021) | 2.27<br>(2017)            | 2.69<br>(2013) |
| Max ice thickness (m)      | 201<br>(2019)  | 148<br>(2017)  | 154<br>(2019)               | 114<br>(2021)  | 113<br>(2017)             | 159<br>(2013)  |
| Volume (km <sup>3</sup> )  | 0.43<br>(2019) | 0.33<br>(2017) | 0.30<br>(2019)              | 0.39<br>(2021) | 0.10<br>(2017)            | 0.15<br>(2013) |
| SMB measurements           | 2014 - 2019    | 2014 - today   | 1958 - 1994<br>2010 - today | *              | 1957-1998<br>2013 - today | 2015 - today   |
| Orientation                | SSW            | NW             | NNW                         | Mainly SSW     | N                         | NW             |
| Current altitude range (m) | 3900 - 4500    | 3900 - 4700    | 3300 - 4400                 | 4000-4600      | 3300 - 4600               | 3900-4800      |
| Type                       | Valley glacier | Valley glacier | Valley glacier              | Ice cap        | Valley glacier            | Valley glacier |

\*Surface mass balance episodically measured (Mikhaleenko, 1989; Dyurgerov, 2002; Arkhipov et al., 2004; Fujita et al., 2011).

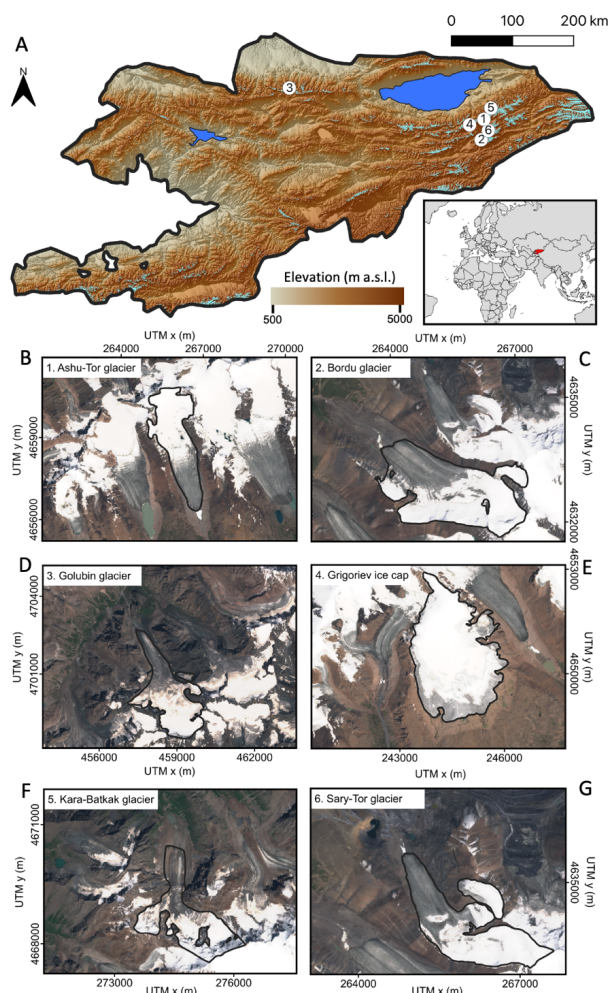

**Figure 1.** Panel A: Selected glaciers and their location in Kyrgyzstan. The DEM is SRTM. All glaciers of the Randolph Glacier Inventory version 6 (RGI v6) are shown in pale blue (RGI consortium, 2017). Panels B-G: Six selected glaciers. The background satellite images are from Sentinel-2 data acquired in July/August 2021. The black outlines of the glaciers show the extent in 2021, determined by manual delineation.

## 2.2 Climatic setting and drainage

The continental climate of the Tien Shan is characterised by a strong seasonal variation in precipitation, a large west to east gradient in total precipitation and large seasonal amplitudes of air temperatures (Barandun and Pohl, 2023). Precipitation is highest in spring and summer accounting for about 75% of the annual total (Kutuzov and Shahgedanova, 2009). This precipitation is primarily caused by convection and a strengthening of instability caused by cold moist air mass influxes from the west (Aizen, 1995). In winter, the advection of precipitation by westerly flow is mostly blocked by the strong influence of the Siberian High. The Ashu-Tor, Bordu and Sary-Tor glaciers as well as the Grigoriev ice cap, are all located in the Arabel

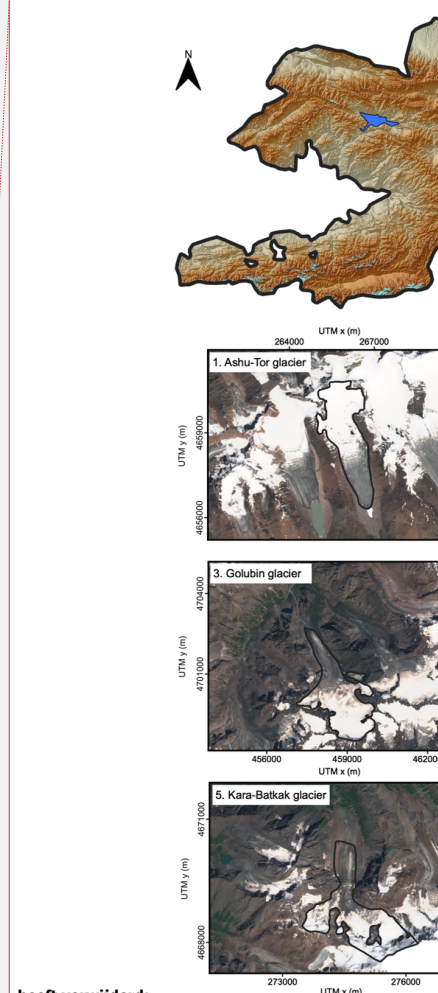

heeft verwijderd:

heeft verwijderd: 1

heeft verwijderd: The background satellite images are from Sentinel-2 data. All RGIv6.0 glaciers are shown in pale blue on the upper map. The black outlines of the glaciers in the individual panels show the extent in 2021. ...he DEM of the upper panel ... [3]

heeft opmaak toegepast ... [1]

heeft opmaak toegepast ... [2]

heeft opmaak toegepast ... [4]

heeft opmaak toegepast: Lettertype: (Standaard) Times New Roman, Tekstkleur: Auto

Met opmaak: Standaard, Regelaafstand: enkel

heeft verwijderd: ...nd large seasonal amplitudes of air temperatures (Barandun and Pohl, 2023). Precipitation is highest in spring and summer accounting for about 75% of the annual total (Kutuzov and Shahgedanova, 2009). This precipitation is primarily caused by convection and a strengthening of instability caused by cold moist air mass influxes from the west (Aizen, 1995). In winter, the advection of precipitation by westerly flow is mostly block ... [5]



plateau system with a very limited amount of annual precipitation ( $\sim 320 \text{ mm yr}^{-1}$  at 3600 m a.s.l.) (Van Tricht et al., 2021b). These ice masses feed several of Central Asia's largest rivers such as the Naryn river, which flows in the Syr Darya river, draining westwards towards the Aral Sea basin (Blomdin et al., 2016). Winter precipitation in the central area of the Tien Shan accounts for only 8-10% of the annual total (Aizen, 1995). This means that the ice masses are characterised by a simultaneous occurrence of main accumulation and main ablation in spring and (early) summer, making them very sensitive to temperature changes in spring and summer (Fujita, 2008; Van Tricht et al., 2021b). A rise in temperatures during this period not only causes increased melting, but also a reduction of snow and a decrease in albedo.

heeft opmaak toegepast: Superscript

The Golubin glacier is located further to the northwest of Kyrgyzstan, in an area which is characterised by a larger amount of annual precipitation, of up to  $550 \text{ mm yr}^{-1}$  at 2000 m a.s.l (Aizen et al., 2006). The greater amount of annual precipitation can be explained by the larger influx of moisture from the northwest, in which direction the Kyrgyz Ala-Too is oriented. In addition to a larger amount of precipitation, precipitation is also more focused on spring (March and April) which implies that summer precipitation events are less important on this glacier. Meltwater from glaciers in the area feed the endorheic basin of the Chu River, which is the major irrigation and water supply for northern Kyrgyzstan including the capital Bishkek and the Kazakh steppe.

The Kara-Batkak glacier finally is located at the northern slopes of the Terskey Ala-Too which is more exposed to moisture originating from the Issyk-Kul Lake. The glacier area is therefore characterised by a wetter climate (on average 600-700 mm  $\text{yr}^{-1}$  at 2600 m a.s.l.) (Van Tricht et al., 2021b). Meltwater from glaciers in this area drains towards the endorheic basin of the Issyk-Kul Lake.

heeft verwijderd: Issyk-Kul lake

### 2.3 Meteorological data

Three meteorological time series are used to represent the climate near the six different ice masses (Tien Shan - Kumtor, Chon-Kyzyl-Suu and Golubin AWS) (Table 2). The reconstructed data series of Tien Shan - Kumtor is used for the Ashu-Tor glacier, the Bordu glacier, the Grigoriev ice cap and the Sary-Tor glacier. For the Kara-Batkak glacier, the dataset of Chon-Kyzyl-Suu is used. All different time series used to create the meteorological dataset are debiased using overlapping periods. For a detailed description on how the data time series for these two stations have been created, we refer to Van Tricht et al. (2021b).

heeft verwijderd: data

heeft verwijderd: Kumtor-

heeft verwijderd: (Van Tricht et al., 2021b)

Concerning the Golubin glacier, a meteorological dataset is created for the location of the AWS at 3300 m a.s.l. near the Golubin glacier (Hoelzle et al., 2017) (Table 2). Directly measured temperatures at this AWS are used for 2014-2021. For 1961-2013, anomalies derived from measured temperatures at the Ala-Archa station (situated at 2145 m a.s.l.  $\sim 10 \text{ km}$  from the front of the Golubin glacier) are used. For the 1901-1960 period, data from the CruTEM (Climatic Research Unit gridded land-based TEMperature database) are taken and between 1750 and 1900, data from tree rings are used (see Van Tricht et al. 2021b for more information) (Table 2). For precipitation we rely on ERA5 data, which are scaled to match the measured mean annual precipitation of the Ala-Archa station for the overlapping period, for 1961-2021. The CruTS (Climatic Research Unit gridded Time Series) dataset is considered for the 1901-1960 period. To represent the precipitation during 1750-1900, data from tree rings are used (Solomina et al., 2014) (Table 2). Like for the other two datasets, the different time series used for the Golubin AWS dataset are debiased using overlapping periods and matched for interannual variability using the standard deviation in the common period.

heeft verwijderd: For the latter glacier,

heeft verwijderd: d

heeft verwijderd:

**Table 2:** Temperature (upper rows) and precipitation (lower rows) datasets and their timespans used in this study.

| Station            | Timespan and source          |                     |                                 |                                 |                  |
|--------------------|------------------------------|---------------------|---------------------------------|---------------------------------|------------------|
| Tien Shan - Kumtor | 1821-1879:<br>Tree ring data | 1880-1929<br>CruTEM | 1930-2006<br>Tien Shan - Kumtor | 2007-2021<br>Tien Shan - Kumtor | 2022-2100<br>GCM |
| Golubin AWS        | 1821-1900:<br>Tree ring data | 1901-1960<br>CruTEM | 1961-2013<br>Ala-Archa          | 2014-2021<br>Golubin AWS        |                  |
| Chon-Kyzyl-Suu     | 1821-1879:<br>Tree ring data | 1880-1947<br>CruTEM | 1948-2021<br>CKS                |                                 |                  |
|                    |                              |                     |                                 |                                 |                  |
| Tien Shan - Kumtor | 1821-1900: Tree<br>ring data | 1901-1929<br>CruTS  | 1930-2006<br>Tien Shan - Kumtor | 2007-2021<br>Tien Shan - Kumtor | 2022-2100<br>GCM |
| Golubin AWS        |                              | 1901-1960<br>CruTS  | 1961-2021<br>ERA5               |                                 |                  |
| Chon-Kyzyl-Suu     |                              | 1901-1947<br>CruTS  | 1948-2021<br>CKS                |                                 |                  |

heeft opmaak toegepast: Lettertype: 9 pt, Vet

heeft opmaak toegepast: Lettertype: 9 pt

Met opmaak: Centrum

Met opmaak: Uitvullen

heeft verwijderd: ¶

heeft opmaak toegepast: Lettertype: 9 pt

## 2.4 Little Ice Age

Glaciers and ice caps in the Kyrgyz Tien Shan repeatedly advanced and retreated throughout the Holocene. The latest period of significant advance was caused by the LIA, and it was dated to 1730-1910. In most areas, several moraines belong to the LIA, indicating different stages of glacial stagnation and advances within this period. However, a majority of terminal and side moraines were formed in the middle of the 19th century (Solomina et al., 2004; Li et al., 2017). In this study, we consider the 1820-1850 average climatic conditions to represent the end of the LIA period.

## 2.5 Future climate

For the future climate (2022-2100) (Table 2), we rely on climate change projections from multiple global climate models (GCMs) which participated in the sixth phase of the Coupled Model Intercomparison Project 6 (CMIP6) (Table 3), available through the Earth System Grid Federation (ESGF) archive. Only the models with a transient climate response inside the 66% likelihood range are considered (Hausfather et al., 2022) (up to 18 GCMs). Five shared socioeconomic pathways (SSP) are considered which represent a peak and decline scenario (SSP1-1.9 and SSP1-2.6), two medium scenarios (SSP2-4.5 and SSP3-7.0), and a high emission scenario (SSP5-8.5). These new climate scenarios have been developed for the Sixth Assessment Report of the Intergovernmental Panel on Climate Change (IPCC AR6).

heeft verwijderd: 2

For every available GCM and every meteorological station, the data are downloaded for both historical runs (1984-2014) and for future projections (2022-2100). The grid cell closest to the meteorological stations is considered. Each GCM has a specific spatial resolution of between 0.93° and 2.50° (Table 3). The data from every individual GCM are then converted into anomalies for temperature and into ratios for precipitation, with respect to the overlapping historical period (1984-2014) and scaled to match the standard deviation of the observations of the specific meteorological datasets (see section 2.3). Then, for every SSP-scenario, the monthly temperature anomalies and precipitation ratios are averaged over all models resulting in a multi-model mean time series, combining up to 18 different GCMs (see Table 3). Next, to account for interannual variability, the data are rescaled using a sequence of historical observations. Finally, as was done for the historical period (Van Tricht et al., 2021b), the monthly data series are downscaled to hourly resolution by using an observed data sequence between 2007 and 2021 for the Tien Shan - Kumtor and Chon-Kyzyl-Suu dataset and 2014-2021 for the Golubin AWS dataset.

heeft verwijderd: .....Pagina-einde.....

**Table 3:** CMIP6 global climate models (GCM) used for the climate projections.

| GCM           | Spatial resolution (lat/lon) | SSP1-1.9 | SSP1-2.6 | SSP2-4.5 | SSP3-7.0 | SSP5-8.5 |
|---------------|------------------------------|----------|----------|----------|----------|----------|
| ACCESS-CM2    | 1.25° x 1.88°                |          | X        | X        | X        | X        |
| ACCESS-ESM1-5 | 1.25° x 1.88°                |          | X        | X        | X        | X        |
| AWI-CM-1-1-MR | 0.93° x 0.94°                |          | X        | X        | X        | X        |
| CAMS-CSM1-0   | 1.11° x 1.13°                | X        | X        | X        | X        | X        |
| CESM2         | 0.94° x 1.25°                |          | X        | X        | X        | X        |
| CESM2-WACCM   | 0.94° x 1.25°                |          | X        | X        | X        | X        |
| CMCC-CM2-SR5  | 0.94° x 1.25°                |          | X        | X        | X        | X        |
| CMCC-ESM2     | 0.94° x 1.25°                |          | X        | X        | X        | X        |
| CNRM-ESM2-1   | 1.39° x 1.41°                |          | X        | X        | X        | X        |
| FGOALS-f3-L   | 1.00° x 1.25°                |          | X        | X        | X        | X        |
| GFDL-ESM4     | 1.00° x 1.25°                | X        | X        | X        | X        | X        |
| IITM-ESM      | 1.89° x 1.88°                |          | X        | X        | X        | X        |
| INM-CM5-0     | 1.50° x 2.00°                |          | X        | X        | X        | X        |
| KACE-1-0-G    | 1.25° x 1.88°                |          | X        | X        | X        | X        |
| MIROC6        | 1.39° x 1.41°                | X        | X        | X        | X        | X        |
| MPI-ESM1-2-HR | 0.93° x 0.94°                |          | X        | X        | X        | X        |
| MRI-ESM2-0    | 1.11° x 1.13°                | X        | X        | X        | X        | X        |
| NorESM2-LM    | 1.89° x 2.50°                |          | X        |          |          | X        |

heeft verwijderd: the average climatic conditions of

heeft verwijderd: -

heeft verwijderd: are repeated

heeft verwijderd: Subsequently, to account for interannual variability, the data are rescaled using a sequence of historical observations. Finally, as was done for the historical period (Van Tricht et al., 2021b), the monthly data series are downscaled to hourly resolution by using an observed data sequence.

heeft verwijderd: 8

heeft verwijderd: 6

heeft verwijderd: 5

heeft verwijderd: 1

In addition, a “No change” scenario is created for which we use a random shuffling of the years between 2001 and 2021, until 2100. The effect of a lower resolution of the GCMs compared to Regional Climate Models (RCMs) is expected to be limited as we consider anomalies and because we impose climatic variability based on observations. Next to that, by combining multiple GCMs, the influence of errors and uncertainties of individual models are assumed to be reduced strongly, which is beneficial for the reliability of future projections. Only for the SSP1-1.9 scenario, a limited number of GCMs (4) was available at the time of the experiments. For all three meteorological datasets, temperatures are projected to increase substantially compared to the 2001-2021 mean, with values between +0.7°C for the SSP1-1.9 scenario and up to +5.7°C for the SSP5-8.5 scenario (Figure 2). The projected evolution of the total precipitation shows a slight but insignificant increase for the Tien Shan – Kumtor location and no real trend for the two other locations (Figure 2). In addition to conducting simulations using the multi-model mean of every SSP scenario, we further generate two additional scenarios for each SSP. These scenarios are designed to incorporate a gradual increase or decrease in temperature, aiming to reach approximately the standard deviation of the projected temperatures at the end of the century across the various GCMs. This approach is implemented to account for the inherent uncertainty between the different GCMs and provides a more comprehensive representation of the possible temperature variations within each SSP. For precipitation, we always consider the multi-model mean.

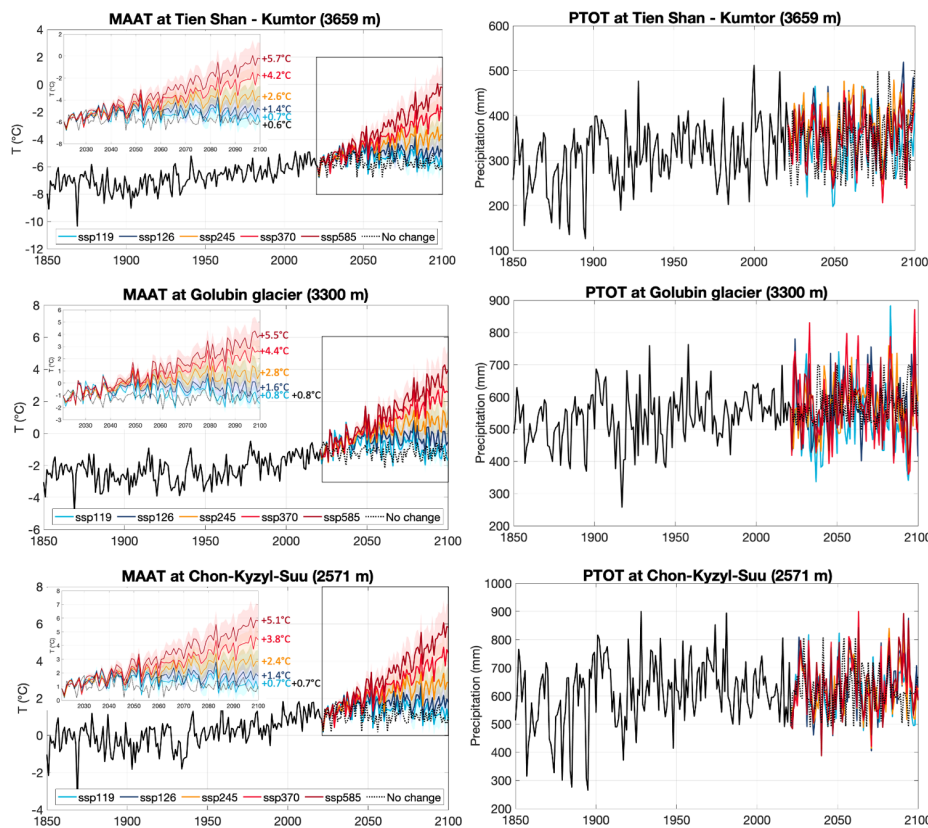

**Figure 2:** Evolution of the mean annual air temperature (MAAT) and the yearly total precipitation (PTOT) between 1850 and 2021 as well as projections until 2100 under different climate scenarios for the three locations. The insets are enlargements of the future temperature. The numbers at the right side of the insets indicate the average warming in 2090-2100 for every scenario with respect to the 1960-1990 average.

### 3 Method and models

#### 3.1 Higher-order ice dynamic flow model

A 3-dimensional higher-order thermo-mechanical ice-flow model (3D HO-model) is used to model the ice flow in this study. In the model, both longitudinal and transverse stress gradients are considered (Zekollari et al., 2013), in contrast to Shallow Ice Approximation (SIA) models (Hutter, 1983). The 3D HO-model assumes cryostatic equilibrium in the vertical, implying that vertical resistive stresses are neglected (Pattyn, 2003), in contrast to Full-Stokes models that incorporate all stresses (Jouvet et al., 2011). Further, it is also assumed that the horizontal gradients of the vertical velocity are much smaller than the vertical gradients in the horizontal velocity. This reduces the processing compared to a Full Stokes model as only the horizontal velocity components are solved for. In the following, the applied model is briefly described. A more detailed description of model can be obtained from Fürst et al. (2011). The vertical velocity component is derived from the incompressibility condition. Nye's

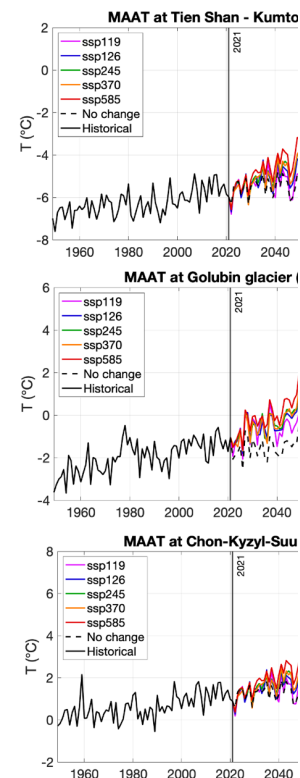

heeft verwijderd:

Met opmaak: Centrum

heeft verwijderd: 9

heeft opmaak toegepast: Lettertype: Niet Vet

heeft verwijderd: left panels

heeft verwijderd: 1

heeft verwijderd: 1

Met opmaak: Kop 1, Regelfstand: 1.5 regel

heeft verwijderd: thermo

heeft verwijderd: 1



generalisation of Glen's flow law (Eq. 1) where a power exponent  $n$  of 3 is used to quantify the ice deformation and the corresponding flow velocity due to internal deformation based on the stresses that act on it:

$$\tau_{ij} = 2\eta\epsilon_{ij} \quad (1)$$

$$\eta = \frac{1}{2} A(T_{\text{pmp}})^{-\frac{1}{n}} (\epsilon_e + \epsilon_0)^{\frac{1}{n}-1} \quad (2)$$

$$A(T_{\text{pmp}}) = E a \exp\left(-\frac{Q}{RT_{\text{pmp}}}\right) \quad (3)$$

$$\epsilon_e^2 = \frac{1}{2} \epsilon_{ij} \epsilon_{ij} \quad (4)$$

$$\epsilon_{ij} = \frac{1}{2} (\partial_i u_j + \partial_j u_i) \quad (5)$$

$\eta$  is the effective viscosity of the ice (Eq. 2), which is defined via the second invariant of the strain rate tensor (Eq. 4).  $E_0$  is a small offset ( $10^{-30}$ ) that ensures finite viscosity. The symbols 'i' and 'j' represent the space derivative with respect to the  $i^{\text{th}}$  and  $j^{\text{th}}$  spatial components. The flow rate factor  $A(T_{\text{pmp}})$  is a function of ice temperature with respect to the pressure melting point (Eq. 3).  $E$  is an enhancement factor which is used for calibration (see section 4). The tuning of the enhancement factor is an implicit way to include the softening effect due to factors such as water content and impurity content (Huybrechts et al., 1990). For temperatures lower than  $-10^\circ\text{C}$ ,  $a = 1.14 \times 10^{-5} \text{ Pa}^n \text{ a}^{-1}$  and  $Q = 60 \text{ kJ mol}^{-1}$  while for temperatures larger than  $-10^\circ\text{C}$ ,  $a = 5.47 \times 10^{10} \text{ Pa}^n \text{ a}^{-1}$  and  $Q = 139 \text{ kJ mol}^{-1}$ .  $R$  is the gas constant ( $8.31 \text{ J mol}^{-1} \text{ K}^{-1}$ ).  $T_{\text{pmp}}$  is the ice temperature relative to the pressure melting point (homologous temperature).  $\epsilon_e^2$  is the effective strain rate as the second invariant of the strain rate tensor.

The strain rate tensor is defined in terms of velocity gradients (Eq. 5) with  $u$  the 3-dimensional components of the velocity vector. Further, in the ice flow model, a Weertman-type sliding law is implemented (Eq. 6). Here, the basal sliding velocity ( $u_b$ ) is proportional to the basal drag ( $\tau_b$ ) to the third power:

$$u_b = -A_{\text{sl}} \tau_b^3 \quad (6)$$

The basal drag corresponds to the sum of all basal resistive stresses.  $A_{\text{sl}}$  is the sliding parameter which is defined as a constant in the model and calibrated for every specific ice mass (see section 3.3). There is no basal sliding when the basal ice temperature is below the pressure melting point. A full 3D calculation of the ice temperatures is performed at all timesteps and for every location. This calculation involves vertical diffusion, three-dimensional advection, and heating caused by deformation and basal sliding, following the methodology described in Van Tricht and Huybrechts (2022). The ice temperatures of the surface layer are determined based on the average annual air temperature and parametrisations that consider the effects of warming due to refreezing meltwater and snow insulation, as well as the effect of the removal of ice at the surface in the ablation area. The study of Van Tricht and Huybrechts (2022) provides the necessary parameters to prescribe these processes:  $41^\circ\text{C}$  (m w.e.)<sup>1</sup> for refreezing meltwater and  $22^\circ\text{C}$  (m w.e.)<sup>1</sup> for insulating snow, which are considered to be constant in space and time for the six ice masses. At the bottom of the ice, heat is produced by geothermal heating and friction caused by basal sliding and ice deformation. A geothermal heat flux of  $50 \text{ mW m}^{-2}$  is prescribed. The model is run on a 25 m resolution with 21 equally spaced layers in the vertical. Calibration consists of tuning the enhancement factor and the basal sliding parameter to minimise differences between modelled and observed ice thickness. The ice flow model is coupled to a simplified surface energy balance model that calculates the spatio-temporal distribution of the surface mass balance (see section 3.2). The continuity equation (Eq. 7) is used to link both models:

$$\frac{\partial H}{\partial t} = -\nabla \cdot (uH) + m_s \quad (7)$$

heeft verwijderd:  $i^{\text{th}}$

heeft verwijderd: (

heeft verwijderd: )

heeft verwijderd:  $m$

heeft verwijderd:  $m$

heeft verwijderd: The

heeft verwijderd: are calculated

heeft verwijderd:

heeft verwijderd: using the approach of

heeft verplaatst (invoeging) [1]

heeft verwijderd: The parameters for warming due to refreezing and snow insulation

heeft opmaak toegepast: Superscript

heeft verwijderd: found in their study

heeft opmaak toegepast: Superscript

heeft verwijderd: different

heeft verwijderd: ¶

heeft omhoog verplaatst [1]: The parameters for warming due to refreezing and snow insulation found in their study are considered to be constant in space and time for the different ice masses. ¶

heeft verwijderd: . ¶

¶

heeft opmaak toegepast: Superscript

heeft verwijderd: , spaced more closely towards the bottom

With  $H$  the ice thickness,  $\mathbf{u}$  the vertically average horizontal velocity vector,  $\nabla$  the 2-d divergence operator and  $m_s$  the surface mass balance. The higher-order velocity field and the changes in ice thickness are calculated twice a week, while the surface mass balance is updated annually.

### 3.2 Surface mass balance model

The selected surface mass balance model is the simplified energy balance model that has been optimised, calibrated, and used in Van Tricht et al. (2021b) for different glaciers in the Tien Shan. The model is based on the net energy balance at the surface with incoming solar radiation, albedo and transmissivity, as well as two tuning parameters ( $C_0$  and  $C_1$ ) representing the sum of the net longwave radiation balance and the turbulent sensible heat exchange. A representation of the surface elevation is used to calculate the insolation based on local slope and aspect, shadow and the elevation-dependent temperature and precipitation.

Calibration of the model is carried out based on measured mass balances at stakes which are interpolated to average values for elevation bands of 100 metres. The input data of the surface mass balance model is limited to hourly precipitation and temperature data of meteorological stations in the vicinity of the ice masses and a surface DEM. An overview of the most important parameters of the surface mass balance model is given in Table 4.  $C_1$  is kept fixed at 24 as was found in Van Tricht et al. (2021a).  $C_0$  is initially taken from Van Tricht et al. (2021b) and Van Tricht and Huybrechts (2022), and then further adjusted based on mass balance observations of the 2020/21 season. All other parameters are reproduced from Van Tricht et al. (2021b). A sinusoidal course of the lapse rate (vertical temperature gradient) is created, based on the monthly lapse rates provided by Aizen et al. (1995), to ensure a smooth transition during the year (see Table 4). For some glaciers, two precipitation gradients are used (Table 3) to account for moisture depletion and wind erosion in the upper reaches above a certain elevation ( $h_{crit}$ ). To correctly reproduce the surface layer temperatures, needed to model the englacial temperatures, the amount of refrozen water and the maximum snow thickness in May are estimated, following the approach described in Van Tricht and Huybrechts (2022).

**Table 4:** Overview of the calibrated parameters. For some ice masses, two different precipitation gradients are adopted, indicated by the subscript 1 and 2, to account for moisture depletion and wind erosion in the upper reaches.  $h_{crit}$  is the elevation above which the second precipitation gradient is used.

|                                                        | Ashu-Tor                                                                                                                                                                            | Bordu | Golubin | Grigoriev | Kara-Batkak | Sary-Tor |
|--------------------------------------------------------|-------------------------------------------------------------------------------------------------------------------------------------------------------------------------------------|-------|---------|-----------|-------------|----------|
| $C_1$                                                  | 24                                                                                                                                                                                  | 24    | 24      | 24        | 24          | 24       |
| $C_0$                                                  | -195                                                                                                                                                                                | -191  | -228    | -195      | -193        | -192     |
| $\partial P / \partial z_1$ (m w.e. km <sup>-1</sup> ) | 0.70                                                                                                                                                                                | 0.50  | 0.20    | 0.15      | 0.30        | 0.50     |
| $h_{crit}$ (m a.s.l.)                                  | /                                                                                                                                                                                   | 4400  | 4050    | /         | 4200        | 4400     |
| $\partial P / \partial z_2$ (m w.e. km <sup>-1</sup> ) | /                                                                                                                                                                                   | -0.40 | -1.50   | /         | -4.00       | -0.40    |
| $\partial T / \partial z$ (°C km <sup>-1</sup> )       | Sinusoidal with a minimum of -6.2 in June and a maximum of -2.3 in December<br>For the Golubin glacier, sinusoidal with a minimum of -7.4 in June and a maximum of -3.5 in December |       |         |           |             |          |

### 3.3 Geometric data

The input data of the ice flow model is limited to a bedrock DEM which is determined by subtracting the measured and reconstructed ice thickness of the different ice masses (Petrakov et al., 2014; Van Tricht et al., 2021a; Van Tricht and Huybrechts, 2022) from a surface DEM as close as possible to the date of the ice thickness data. To represent the surface elevation, the TerraSAR-X add-on for Digital Elevation Measurement mission (TanDEM-X) (2013) is selected. In the frontal areas for all glaciers, and for the entire Bordu glacier, Grigoriev ice cap and Sary-Tor glacier, the surface DEM is derived from photogrammetrically created Digital Surface Models (DSMs) from UAV images in 2021, created following the approach

heeft verwijderd: recent

heeft verwijderd: recent

heeft verwijderd: 2

heeft verwijderd: 3

heeft verwijderd: 3

heeft verwijderd: H

heeft opmaak toegepast: Lettertype: Niet Vet

heeft opmaak toegepast: Lettertype: Niet Vet

described in Van Tricht et al. (2021c). A LIA mask is created to avoid ice flowing over ridges away from the glaciers in the accumulation areas. This mask is determined by manual delineation of the LIA ice boundary based on unique and well-recognisable moraines on satellite images from Sentinel and Landsat. The LIA extent and the retreat of the Golubin glacier is adopted from data presented in Aizen et al. (2006), which date back to tacheometric surveys from the mid 19<sup>th</sup> century (Venukov, 1861). In 1861, the Golubin glacier terminus was located in a deep canyon at 2900 m a.s.l. (Venukov, 1861; Aizen et al., 2006). Between 1861-1913, the terminus retreated to 3050 m a.s.l. From 1913 to 1949, the terminus retreated to an elevation of 3150 m and by 1963, it reached 3250 m a.s.l. Between 1958 and 1982, small annual oscillations of the terminus position were measured (Aizen et al., 1983). From 1982 onwards, the terminus retreated in a rather constant way.

### 3.4 Calibration of the flow parameters

Our initial iterative minimisation procedure aims to simulate the ice thickness distribution as close as possible to the observations. The latter concern the ice thickness distribution of the different ice masses created from measurements and reconstruction for the Ashu-Tor (2019), Bordu (2017), Kara-Batkak (2017) and Golubin glaciers (2019) (Van Tricht et al., 2021a), the Grigoriev ice cap (2021) (Van Tricht and Huybrechts, 2022), and the Sary-Tor glacier (2013) (Petrakov et al., 2014) (see Table 1). To do this, the coupled velocity and temperature model is run forward until a steady state is reached using average 1960-1990 climatic conditions. The latter period is considered as the climate regime resulting in the present-day ice geometry, considering a typical response time of 30-60 years (Jóhannesson et al., 1989). To take into account a mismatch of the steady state assumption, the surface mass balance is modified by implementing a temperature and/or precipitation bias to achieve the best possible fit between the modelled extent of the ice masses and the observed ice mass extent (length calibration).

When a steady state with the desired length is reached (zero ice thickness change), the obtained ice thickness distribution is compared with the measured ice thickness distribution and the RMSE is calculated. Subsequently, the basal sliding parameter ( $A_b$ ) and the enhancement factor ( $E$ ) are adjusted within a predefined range, and the model is run until a new steady state is reached for the new parameter combination. Calibration then consists of looking for the combination of parameters with a minimal RMSE between modelled and observed ice thickness. The enhancement factor is varied between 1 and 15 in steps of 1 and the basal sliding parameter is varied between  $1 \times 10^{-15}$  and  $1 \times 10^{-13} \text{ Pa}^{-3} \text{ m}^2 \text{ yr}^{-1}$  for a predefined set of values. The parameter combination with the minimum RMSE for every ice mass is used for the initial runs. In the dynamical calibration procedure (see section 4.2), the flow parameters might be further adjusted by comparing time-dependent modelled ice thickness and velocities (if available) with observations.

Table 5: Calibration of the flow parameters.

|                                                                          | Ashu-Tor            | Bordu               | Golubin             | Grigoriev           | Kara-Batkak         | Sary-Tor            |
|--------------------------------------------------------------------------|---------------------|---------------------|---------------------|---------------------|---------------------|---------------------|
| Enhancement $\{E\}$                                                      | 2                   | 2                   | 3                   | 2                   | 4                   | 3                   |
| Basal sliding $\{A_b\}$ ( $\text{Pa}^{-3} \text{ m}^2 \text{ yr}^{-1}$ ) | $5 \times 10^{-14}$ | $5 \times 10^{-14}$ | $5 \times 10^{-14}$ | $5 \times 10^{-14}$ | $1 \times 10^{-14}$ | $5 \times 10^{-14}$ |
| RMSE ice thickness (m i.e.)                                              | 10.7                | 16.1                | 10.2                | 10.5                | 13.5                | 14.9                |
| RMSE velocity (m yr <sup>-1</sup> ) [nr. Obs.]                           | 1.6 [7]             | 1.8 [24]            | 2.1 [15]            | 0.4 [8]             | 10.7 [37]           | 1.4 [43]            |

The optimal enhancement factors and basal sliding parameters are close to each other (Table 5), which increases the confidence in the calibrated values. The RMSE between modelled and measured ice thickness is for all ice masses between 10.2 and 16.1 m, while the ME is between -2.3 m and 6.2 m. With average ice thicknesses of about 100 m, this shows that the modelled ice thicknesses are within 10% of the observations. The RMSE of the modelled velocities are of the order of  $1-2 \text{ m yr}^{-1}$ , except for the Kara-Batkak glacier for which the RMSE is larger ( $11 \text{ m yr}^{-1}$ ). With regard to the latter, the velocities are higher (up to  $60 \text{ m yr}^{-1}$ ) and for the highest values there are some mismatches that strongly affect the RMSE (see Figure 6). For the

heeft verwijderd: .

heeft verwijderd: 3

heeft verwijderd: observations...concern the ice thickness distribution of the different ice masses created from measurements and modelling...reconstruction for the Ashu-Tor (2019), Bordu Kara-Batkak (2017) and Golubin glaciers (2019) (Van Tricht et al., 2021a), the Grigoriev ice cap (2021) (Van Tricht and Huybrechts, 2022), and the Sary-Tor glacier (2013) (Petrakov et al., 2014) (see Table 1). To do this, the coupled velocity and temperature fields are...odel is run forward until a steady state is reached using average 1960-1990 climatic conditions. The latter period is considered as the climate regime resulting in the present-day ice geometry, considering a typical response time of 30-60 years (Jóhannesson et al., 1989). To take into account a mismatch of the steady state assumption, the surface mass balance distribution...is homogeneously adjusted...odified by implementing a temperature and/or precipitation bias to achieve the best possible optimally...it between the modelled extent of the ice masses with the ice mass extent of the observations (... [6])

heeft verwijderd: m... are adjusted within a predefined range, and the model is run until a new steady state is reached for the new parameter combination. Calibration then consists of looking for the combination of parameters with a minimal RMSE between modelled and observed ice thickness. The enhancement factor is varied between 1 and 15 in steps of 1 and the basal sliding parameter is varied between  $15 \times 10^{-15}$  and  $1 \times 10^{-13} \text{ m}^8 \text{ N}^{-3} \dots \text{a}^3 \text{ m}^2 \text{ yr}^{-1}$ . (... [7])

heeft verwijderd: 1

Met opmaak: Bijschrift, Regelfstand: Meerdere 1.15 rg, Bij volgende alinea houden

heeft opmaak toegepast: Lettertype: 9 pt

heeft opmaak toegepast (... [8])

heeft opmaak toegepast (... [9])

heeft opmaak toegepast (... [10])

heeft opmaak toegepast (... [11])

heeft opmaak toegepast (... [12])

heeft opmaak toegepast (... [13])

heeft opmaak toegepast (... [14])

heeft opmaak toegepast (... [15])

heeft verwijderd: 1

heeft verwijderd: 8

heeft verwijderd: 1

heeft verwijderd: 4...51 (... [16])

heeft verwijderd: 2...58 (... [17])

heeft verwijderd: 6...91 (... [18])

heeft opmaak toegepast: Lettertype: 9 pt, Niet Cursief

heeft opmaak toegepast: Lettertype: 9 pt

Tabel met opmaak

heeft verwijderd: 2

heeft verwijderd: 1...18 (... [20])

heeft verwijderd: 3

heeft verwijderd: 1...70 (... [21])

heeft verwijderd: 7

heeft opmaak toegepast (... [19])

heeft verwijderd: 4..., which increases the confidence in the calibrated values, and which shows that these patterns might be regionally uniform... The RMSE between modelled and measured thickness is for all ice masses between 10.21...and 16.17...m, while the ME is between -24...36...m and 611...28...m. With average ice thicknesses of about 100 m, this shows that the modelled ice thicknesses are within 10% of the observations. The RMSE of the modelled velocities are of the order of  $1-23 \dots \text{m yr}^{-1}$ , except (... [22])

comparison between modelled velocities and observed velocities of the Grigoriev ice cap, we use the stake locations of Fujita et al. (2011) from 2006-2007 and one additional velocity observation that could be created based on feature tracking on the eastern outlet glacier using Sentinel satellite images of 2017 and 2018. It must be noted that the stakes were only located in the upper (and slower) part of the ice cap.

#### 4 Dynamical calibration and historical reconstruction

To obtain a reliable prognosis of the future evolution of the selected ice masses, it is crucial to simulate their historical retreat, because the current ice masses are still responding to past changes. Therefore, the ice flow model is first dynamically calibrated to reproduce the observed retreat since the end of the LIA. For this purpose, outlines of different years, which are derived from satellite images (Landsat, Sentinel) and from previous reconstructions, are used.

##### 4.1 Ice geometry at the end of the LIA

The starting point of the historical reconstructions is the end of the LIA which is set at 1850, based on obtained lichenometric dates of LIA moraines (Savoskul and Solomina, 1996; Solomina et al., 2004; Li et al., 2017). To start, the coupled model is run for constant average 1820-1850 climatic conditions until a steady state is reached. Then, the obtained ice masses are compared with the LIA extent derived from clearly visible unique end moraines on satellite images. Based on this comparison, a temperature/precipitation bias is searched and applied to acquire the LIA geometry of all ice masses (Table 6). These biases are determined by assessing combinations between  $\pm 0.2^\circ\text{C}$  for temperature and  $\pm 0.15\%$  for precipitation, while keeping the impact of the biases on the modelled ice thickness as low as possible. The small biases needed to reconstruct the LIA indicate a rather good reliability of the meteorological data used to represent the end of the LIA.

**Table 6:** Reconstructed ice volume and maximum ice thickness at the end of the Little Ice Age (1850) of the different ice masses. A temperature and/or precipitation bias is used to acquire the supposed LIA extent.

|                                               | Ashu-Tor | Bordu  | Golubin | Grigoriev | Kara-Batkak | Sary-Tor |
|-----------------------------------------------|----------|--------|---------|-----------|-------------|----------|
| Ice volume ( $\text{km}^3$ )                  | 0.71     | 0.61   | 0.45    | 0.81      | 0.19        | 0.28     |
| Max ice thickness (m)                         | 223.17   | 186.13 | 185.40  | 127.73    | 158.31      | 176.52   |
| Temperature bias ( $^\circ\text{C yr}^{-1}$ ) | +0.15    | 0      | 0       | +0.15     | 0           | 0        |
| Precipitation bias ( $\% \text{ yr}^{-1}$ )   | -10      | +5     | +5      | -15       | +5          | 0        |

The 1850 geometry of the different ice masses resulting from the calibrated ice flow model is significantly larger than the present-day outline, especially in the frontal areas (Figure 3). Higher up the ice masses, at the altitude of the current accumulation areas, the ice geometry has changed little, both in thickness and in extent. The Bordu and Sary-Tor glaciers, which are located in neighbouring valleys, have a gently sloping bedrock so they had very similar thicknesses and sizes at the end of the LIA. The Ashu-Tor glacier is situated on a flat bedrock, which characterises this glacier by a distinctly thicker ice body. The Kara-Batkak glacier occupies a much greater elevation interval and has a steeper bedrock. Therefore, this glacier has always been thinner compared to the other ice masses. However, at the end of the LIA, the maximum ice thickness was 30% more than the current maximum. The Golubin glacier extended at the end of the LIA much more to the northwest ending at a steep north facing valley side (Venukov, 1861). The Grigoriev ice cap was especially larger at the southern margin and also merged with the Chontor glacier to the west and the Popova glacier to the east (both are not modelled separately in this study).

heeft verwijderd: se

Met opmaak: Regelfstand: enkel

Met opmaak: Regelfstand: enkel

heeft verwijderd: uniform mass balance... emperature/precipitation bias is searched and applied to acquire the LIA geometry of all ice masses (Table 65.... These biases are determined by assessing combinations between  $\pm 0.2^\circ\text{C}$  for temperature and  $\pm 0.15\%$  for precipitation, while keeping the impact of the biases on the modelled ice thickness as low as possible. The small biases needed to reconstruct the LIA ( $-0.20$  to  $+0.04$  m w.e.) indicateshow

heeft verwijderd: 5... Reconstructed ice volume and maximum ice thickness at the end of the Little Ice Age (1850) of the different ice masses. A temperature and/or precipitationmass balance...bias is usedadded...to acquire the supposed LIA extent.

Met opmaak: Bijscript, Bij volgende alinea houden

heeft opmaak toegepast: Lettertype: 9 pt, Niet Cursief

heeft opmaak toegepast: Lettertype: 9 pt

heeft opmaak toegepast

heeft verwijderd: 0.66

heeft verwijderd: 0.61

heeft verwijderd: 0.45

heeft verwijderd: 0.71

heeft verwijderd: 0.20

heeft verwijderd: 0.28

heeft opmaak toegepast

heeft verwijderd: 214

heeft verwijderd: 189

heeft verwijderd: 186

heeft verwijderd: 115

heeft verwijderd: 164

heeft verwijderd: 177

heeft opmaak toegepast

heeft verwijderd: m

heeft verwijderd: ....bias (m w.e.)

heeft verwijderd: -0.20

heeft verwijderd: +0.04

heeft verwijderd: +0.03

heeft verwijderd: -0.20

heeft verwijderd: +0.04

heeft verwijderd: 0

heeft opmaak toegepast: Lettertype: 9 pt, Niet Cursief

heeft opmaak toegepast: Lettertype: 9 pt, Niet Cursief, Niet Superscript/ Subscript

heeft opmaak toegepast: Lettertype: 9 pt

heeft opmaak toegepast

heeft verwijderd: geometry of the LIA



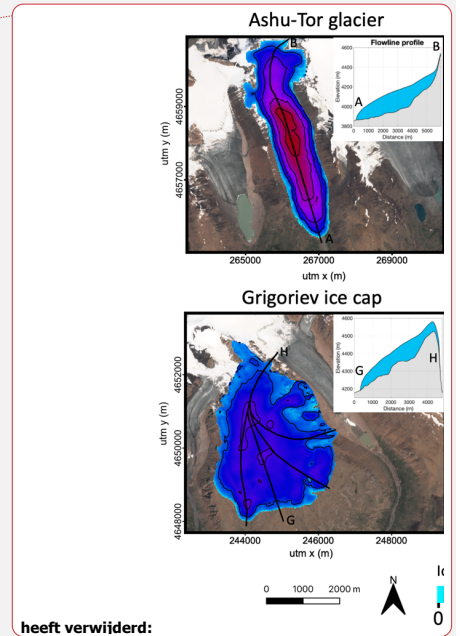

heeft verwijderd:

- heeft verwijderd:** central
- heeft verwijderd:** central
- heeft verwijderd:** d
- heeft verwijderd:** uniform
- heeft verwijderd:** mass balance
- heeft verwijderd:** ( $\delta m_s$ )
- heeft verwijderd:** iteratively added
- heeft verwijderd:** (Eq. 8)
- heeft verwijderd:** , similar to the approach of Zekollari et al. (2014)...
- heeft verwijderd:**  $\frac{m_s(x,y,t)}{m_s(x,y,t)} = m_s(x,y,t) + \delta m_s \rightarrow \rightarrow \rightarrow \rightarrow \rightarrow \rightarrow \rightarrow \rightarrow \rightarrow$  (8)
- heeft verwijderd:** .

Then, starting from the obtained steady state LIA geometry (Figure 3), the surface mass balance is annually calculated [for the evolving modelled surface topography](#) using the energy balance model to simulate the historical evolution of the ice masses between 1850 and 2021. The modelled length of the [main](#) flowline is compared with lengths derived from satellite data. Since the Grigoriev ice cap does not have a unique [main](#) flowline, as is typical for an ice cap, we chose to use 4 separate flowlines and dynamically calibrate [for the mean length of the flowlines](#). By comparing [with the intermediate extents](#), a [temperature and/or precipitation bias](#) is searched and [used](#) to match the historical modelled extents optimally with the observed extents. This bias implicitly accounts for uncertainties in the mass balance model and errors in the climatic records. The bias varies in time and appears to be necessary to reproduce closely the observed retreat of the different ice masses [in the past, where reconstructed climatic data are characterised by greater uncertainty](#). For at least the last three decades, which corresponds to a typical response time of the studied ice masses (Jóhannesson et al., 1989), no biases need to be applied to correctly reconstruct the observed retreat. This suggests that the surface mass balance derived for the recent (more accurate data from local measurements) decades provides a more correct forcing for the ice flow model, which increases the confidence in the calibrated model used in this study.

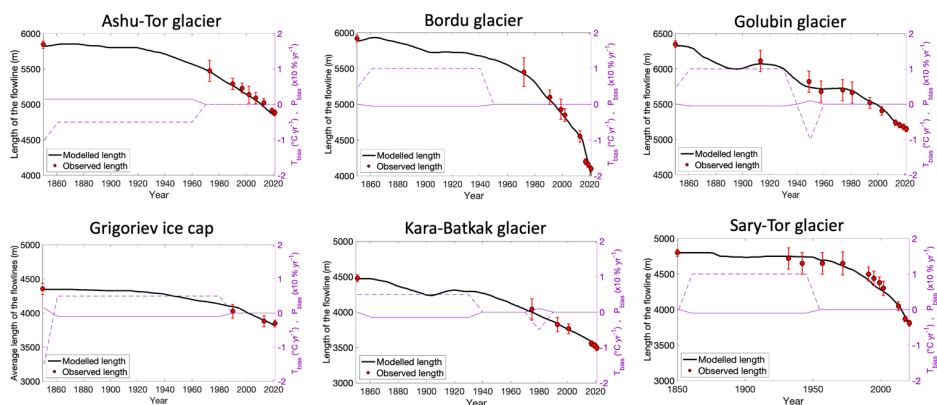

**Figure 4:** Reconstructed retreat of the different ice masses along the main flowline and observed extent (red circles). The temperature bias ( $^{\circ}\text{C yr}^{-1}$ ) is shown as the solid purple line, while the precipitation bias is shown as the dashed purple line ( $\times 10\% \text{ yr}^{-1}$ ). The red dots represent the observed length. The confidence interval (red whiskers) is determined based on the quality and the resolution of the satellite data used for the determination of the front positions.

In the second half of the 19<sup>th</sup> century, the ice masses only slightly retreated (Figure 4). Then, in the beginning of the 20<sup>th</sup> century, lower temperatures ensured for some of the ice masses a period of (slight) advance, which is most noticeable for the Golubin glacier and the Kara-Batkak glacier, which are characterised by the smallest response time following the approach of Jóhannesson et al. (1989). In the second half of the 20<sup>th</sup> century and especially after 1970, the retreat clearly accelerated for all of the ice masses.

### 4.3 Comparison with observed ice thicknesses and surface velocities

We first evaluate the modelled ice thickness with the ice thickness measurements and reconstructions reported in previous studies (Petrakov et al., 2014; Van Tricht et al., 2021a; Van Tricht and Huybrechts, 2022). The results reveal a strong agreement between the modelled thickness and the measured and reconstructed thickness, with in general small differences, especially for the areas where GPR measurements were conducted (Petrakov et al., 2014; Van Tricht and Huybrechts, 2021a, Van Tricht and Huybrechts, 2022). Overall, the RMSE and mean error (ME) are found to be low (Figure 5). This is a logical outcome, considering that the ice thickness observations were utilised to calibrate the flow parameters.

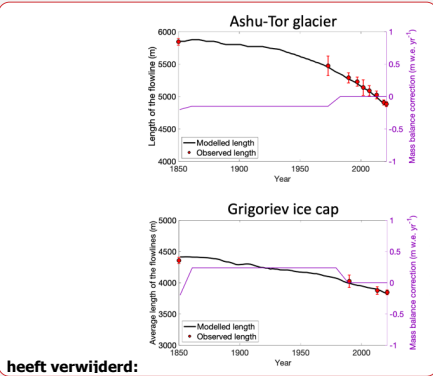

heeft verwijderd:

heeft verwijderd: The surface  
heeft verwijderd: mass balance

heeft verwijderd: A first validation of the ice flow model and the dynamical calibration is performed by comparing  
heeft verwijderd: obtained  
heeft verwijderd: with measured ice thickness  
heeft verwijderd: , and by comparing with surface velocities  
heeft verwijderd: There is clearly a good correspondence  
heeft verwijderd:  
heeft verwijderd: made  
heeft verwijderd: We  
heeft verwijderd: find overall a low  
heeft verwijderd: This increases the confidence in the model parameters selected in this study.

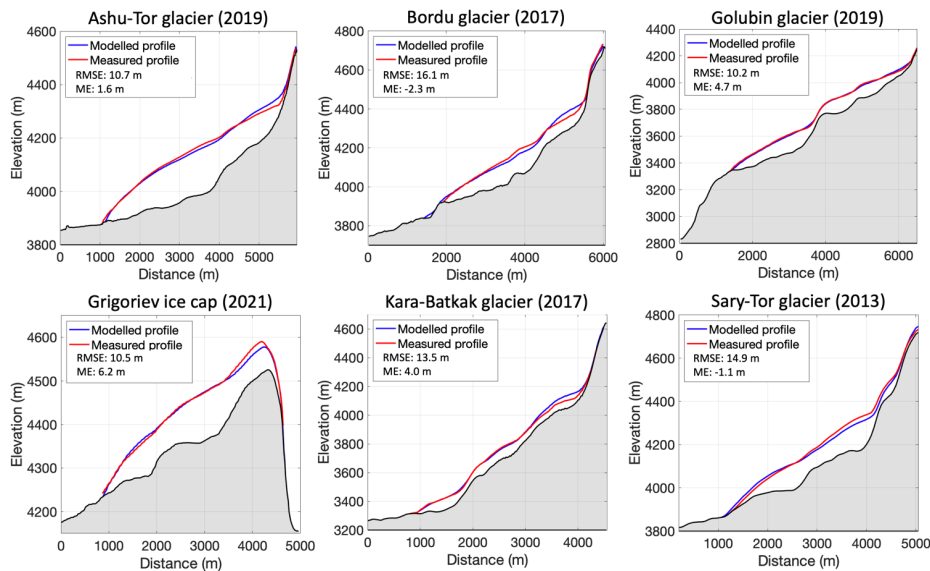

Figure 5: Comparison between the modelled ice thickness profile with measured and reconstructed ice thicknesses.

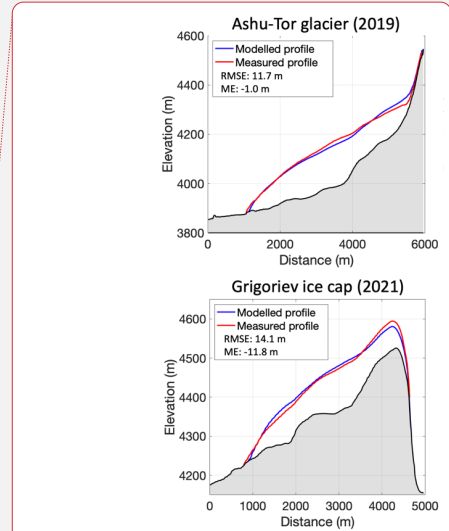

heeft verwijderd:

heeft verwijderd: Validation of the

heeft verwijderd: A second validation is performed by comparing...

heeft verwijderd: well-detectable

heeft verwijderd: on the

heeft verwijderd: images

Subsequently, we assess the modelled surface velocities by comparing them with the point surface velocities derived from stake displacements and the displacements of identifiable features such as supraglacial boulders captured on UAV and satellite images for various years spanning from 2012 to 2021. Like for the ice thickness, we find a close agreement with low values of the RMSE and the ME. In addition, there does not seem to be a bias towards higher or lower velocities for any of the ice masses compared to the observations.

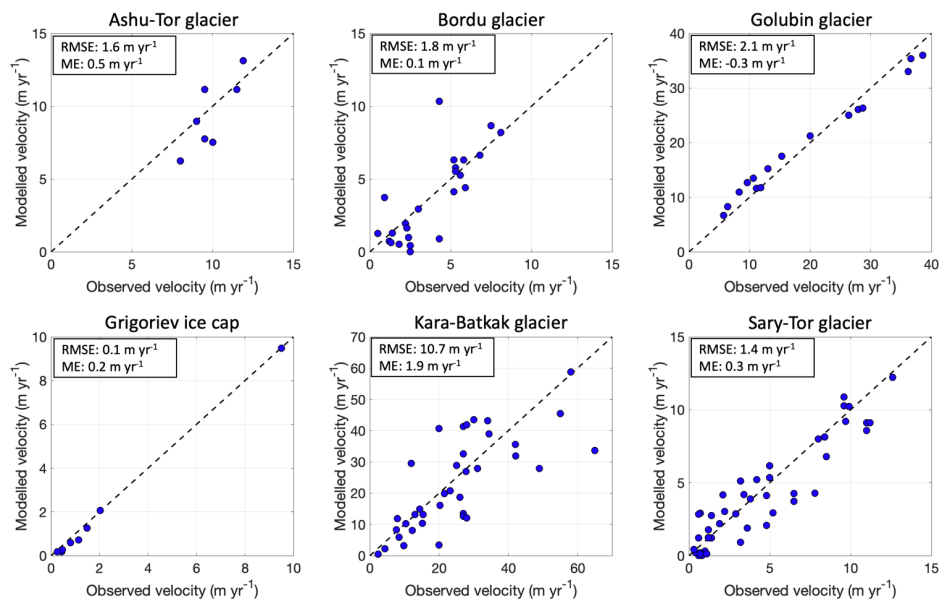

Figure 6: Comparison between the modelled surface velocities and measured velocities. The diagonal is the 1:1 line.

#### 4.4. Validation with geodetic mass balances and ice thickness in 2000

As an individual and independent validation of our study, the historical reconstructions of the ice masses are compared with geodetic mass balances for multiple periods (Table 7). In general, we find a close correspondence that is mostly within the uncertainty ranges of the geodetic mass balances. Only for the Kara-Batkak glacier, there are larger discrepancies which might be caused by the absence of the highest part of the accumulation area in the RGI version 6.0 dataset that is used to derive most of the geodetic mass balances. For the latest dataset, which comprises the elevation change rate of 2000-2019 (Hugonnet et al., 2021), we find for all ice masses a very close correspondence, except for the Ashu-Tor glacier (Table 7). The geodetic value for this glacier is very negative and much lower than for the surrounding glaciers. The Ashu-Tor glacier might be affected by local climate characteristics that are not captured by the Tien Shan – Kumtor weather station or our mass balance model. The Kara-Batkak glacier is clearly characterised by the least negative modelled elevation change rate as geodetic mass balance (Table 7), which matches to the slower and more limited retreat and melting of this glacier (see also Figure 7). As an additional validation, we also compare the modelled ice thickness in 2000 with ice thicknesses derived using the Shuttle Radar Topography Mission (SRTM) DEM. In general, we find low RMSE values: 14.9 m i.e. for the Ashu-Tor glacier, 16.4 m i.e. for Bordu glacier, 12.3 m i.e. for Golubin glacier, 15.2 m i.e. for the Grigoriev ice cap, 13.2 m i.e. for the Kara-Batkak glacier and 16.2 m i.e. for Sary-Tor glacier.

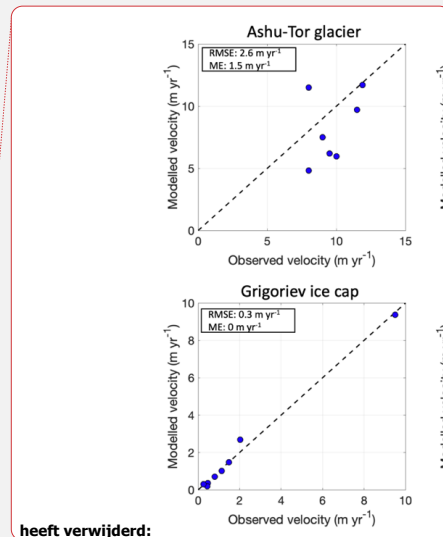

heeft verwijderd:

heeft verwijderd: Validation of the

heeft verwijderd: with

heeft verwijderd: Comparison

heeft opmaak toegepast: Lettertype: 10 pt

Met opmaak: Meerdere niveaus + Niveau: 2 + Nummeringstijl: 1, 2, 3, ... + Beginnen bij: 4 + Uitlijning: Links + Uitgelijnd op: 0 cm + Inspringen op: 0.63 cm

heeft verwijderd: 6

heeft verwijderd: 6

heeft verwijderd: seems to be

heeft verwijderd: 6

heeft opmaak toegepast: Lettertype: 10 pt

heeft opmaak toegepast: Lettertype: 10 pt

heeft opmaak toegepast: Lettertype: 9 pt, Engels (V.S.)



895 **Table 7: Validation** between geodetic mass balances and modelled elevation change rates for different periods. Both values are given in m w.e. yr<sup>-1</sup>. The cells displaying modelled values beyond the range of geodetic mass balance ± uncertainty are highlighted in red.

| ▲                      | Ashu-Tor glacier  |          | Bordu glacier       |          | Golubin glacier  |          |
|------------------------|-------------------|----------|---------------------|----------|------------------|----------|
|                        | Geodetic          | Modelled | Geodetic            | Modelled | Geodetic         | Modelled |
| 1964-1999 <sup>1</sup> |                   |          |                     |          | -0.46 ± 0.24     | -0.12    |
| 1975-1999 <sup>2</sup> |                   |          | -0.79 ± 0.25        | -0.79    |                  |          |
| 1999-2012 <sup>1</sup> |                   |          |                     |          | -0.28 ± 0.97     | -0.36    |
| 2006-2014 <sup>3</sup> |                   |          |                     |          | -0.30 ± 0.37     | -0.47    |
| 2000-2016 <sup>4</sup> | -0.55 ± 0.22      | -0.35    | -0.43 ± 0.17        | -0.52    | -0.05 ± 0.22     | -0.35    |
| 2000-2018 <sup>5</sup> | -0.57 ± 0.11      | -0.40    | -0.35 ± 0.11        | -0.46    | 0.09 ± 0.31      | -0.39    |
| 2000-2019 <sup>6</sup> | -0.87 ± 0.16      | -0.41    | -0.50 ± 0.15        | -0.56    | -0.30 ± 0.16     | -0.36    |
|                        | Grigoriev ice cap |          | Kara-Batkak glacier |          | Sary-Tor glacier |          |
|                        | Geodetic          | Modelled | Geodetic            | Modelled | Geodetic         | Modelled |
| 1943-1977 <sup>7</sup> |                   |          |                     |          | -0.48            | -0.31    |
| 1964-1980 <sup>8</sup> |                   |          |                     |          | -0.30 ± 0.40     | -0.42    |
| 1975-1999 <sup>2</sup> |                   |          | -0.54 ± 0.25        | -0.33    | -0.51 ± 0.25     | -0.61    |
| 2000-2016 <sup>4</sup> |                   |          | -0.45 ± 0.03        | -0.24    | -0.45 ± 0.23     | -0.49    |
| 2000-2018 <sup>5</sup> |                   |          | -0.19 ± 0.14        | -0.26    | -0.43 ± 0.18     | -0.48    |
| 2000-2019 <sup>6</sup> | -0.34 ± 0.16      | -0.46    | -0.16 ± 0.34        | -0.27    | -0.48 ± 0.16     | -0.54    |

<sup>1</sup>Bolch et al., (2015); <sup>2</sup>Pieczonka and Bolch, (2015); <sup>3</sup>Barandun et al., (2018); <sup>4</sup>Brun et al., (2017); <sup>5</sup>Shean et al., (2020); Hugonnet et al., (2021); <sup>7</sup>Aizen et al., (2007); <sup>8</sup>Goerlich et al., (2017).

900 **5 Future evolution of the ice masses**

905 **5.1 Projected ice volume and area for 2022-2100**

Under all considered SSP-scenarios, the results show a strong volume and area loss for all ice masses (Figure 7). In the case of the SSP5-8.5 scenario, the ice masses entirely disappear by 2100, except for the Kara-Batkak glacier for which 3% of the 2021 volume remains, located in the upper area (Figure 9). The rate of decline of the ice masses varies, although the majority of the ice masses already disappear by 2080.

For the other SSP-scenarios, there are some notable differences in response of the ice masses to the imposed climate. The Grigoriev ice cap retreats to (almost) 0% of its current volume, except for SSP1-1.9 (Figure 7). Even under the 2001-2021 climate, only 33% of the present-day ice volume remains by 2100. This very strong retreat of the Grigoriev ice cap can be explained by the limited altitudinal extent or the 'small ice cap instability'. The Grigoriev ice cap is located on top of a rather flat mountain which means that the ice cap cannot retreat to higher elevations (Van Tricht and Huybrechts, 2022). At present, the ELA is located around 4350-4400 metres which is only 100-150 metres below the summit. A more negative mass balance in the future causes a thinning and a lowering of the surface, which amplifies the melting (positive feedback effect). The Grigoriev ice cap is therefore largely dependent on its own height to sustain itself, while glaciers can migrate up- or downwards when reacting to a changing climate. Under SSP2-4.5, the ELA already rises to the summit before the middle of the 21<sup>st</sup> century (Figure 8).

heeft verwijderd: 6  
heeft verwijderd: Comparison  
heeft opmaak toegepast: Lettertype: Niet Vet  
heeft opmaak toegepast: Engels (V.S.)

Tabel met opmaak  
heeft verwijderd: 64  
heeft verwijderd: 1  
heeft verwijderd: 1  
heeft verwijderd: 6  
heeft verwijderd: 46  
heeft verwijderd: 4  
Tabel met opmaak  
heeft verwijderd: 38  
heeft verwijderd: 8  
heeft verwijderd: 3  
heeft verwijderd: 0  
heeft verwijderd: 48  
heeft verwijderd: 1  
heeft verwijderd: 0  
heeft verwijderd: 38  
heeft verwijderd: 25  
heeft verwijderd: 51  
heeft verwijderd: 17  
heeft verwijderd: 37  
Tabel met opmaak  
heeft verwijderd: 18  
heeft verwijderd: 39  
heeft verwijderd: 2  
heeft verwijderd: 0  
heeft verwijderd: 40  
heeft verwijderd: 1  
heeft opmaak toegepast  
heeft verwijderd: 1  
heeft verwijderd: 10

heeft verwijderd: under all climate scenarios  
heeft verwijderd:  
heeft verwijderd: 40  
heeft verwijderd: and

955 The evolution of the Ashu-Tor, Bordu and Sary-Tor glaciers is under all scenarios rather similar (Figure 7). Under the present-day climate, about 50% of the current volume remains in 2100. Under SSP1-1.9 and SSP1-2.6, most of the ice mass disappears except for the upper areas, with a total remaining volume which is about 20-30% of the current volume. Under SSP2-4.5 and SSP3-7.0, the glaciers disappear (almost) completely, except for some smaller patches at the highest elevations, which would likely also melt after 2100. Figure 8 reveals that under SSP2-4.5, the ELA rises to the highest elevations of the Ashu-Tor glacier by 2050, and slightly later for the Bordu and the Sary-Tor glaciers.

heeft verwijderd: -

heeft verwijderd: 1

965 The Kara-Batkak glacier is the one with the largest percentage of volume remaining in any scenario (Figure 7). This can be explained by a combination of the large altitudinal range (which means that the glacier can migrate to higher altitudes), and the larger amount of winter and spring precipitation for this glacier. The latter makes the accumulation less sensitive to temperature changes compared to the glaciers in the drier area of the Inner Tien Shan, which are mainly characterised by spring and (early) summer accumulation. This is also clear from Figure 8 which displays that under the SSP2-4.5 scenario, more than 50% of the glacier area is located in the accumulation area by 2100. The temporal evolution of the accumulation area ratio (AAR) for the Kara-Batkak glacier is highly influenced by its unique topography, characterised by distinct plateaus that are separated by ice falls. Consequently, the AAR can persist at a consistent level for an extended duration, even as the equilibrium line altitude (ELA) gradually rises.

Met opmaak: Kleurrijke lijst - accent 11

heeft verwijderd:

heeft opmaak toegepast: Afspatiëren op 16 pt

heeft verwijderd: 1

975 Regarding the Golubin glacier, we find a large difference between the SSP1-1.9, SSP1-2.6, and SSP2-4.5 scenarios (Figure 7). This is related to the specific geometry. The Golubin glacier consists of a large plateau that under SSP2-4.5 is located below the ELA while under SSP1-2.6, in 2100, it is still around the ELA and under SSP1-1.9, it is still located above the ELA. Under SSP1-1.9, 45% of the present-day volume remains by the end of the century and the Golubin glacier even starts to become larger again, while this reduces to 30% for SSP1-2.6 and 11% for SSP2-4.5. This underscores the fact that in order to understand the response of an ice mass to climate change, and to compare it with other ice masses, the specific geometry has to be considered.

980 In the case of the present-day climate, the Ashu-Tor, Bordu and Sary-Tor glaciers as well as the Grigoriev ice cap retreat strongly, which shows the current imbalance of these ice masses with a large, committed ice loss (Figure 7). The loss of the Golubin and the Kara-Batkak glacier under the 2001-2021 climate is much lower which means that these ice masses currently have a volume and area that is more in balance with the present-day climatic conditions.

heeft verwijderd: current

985

990

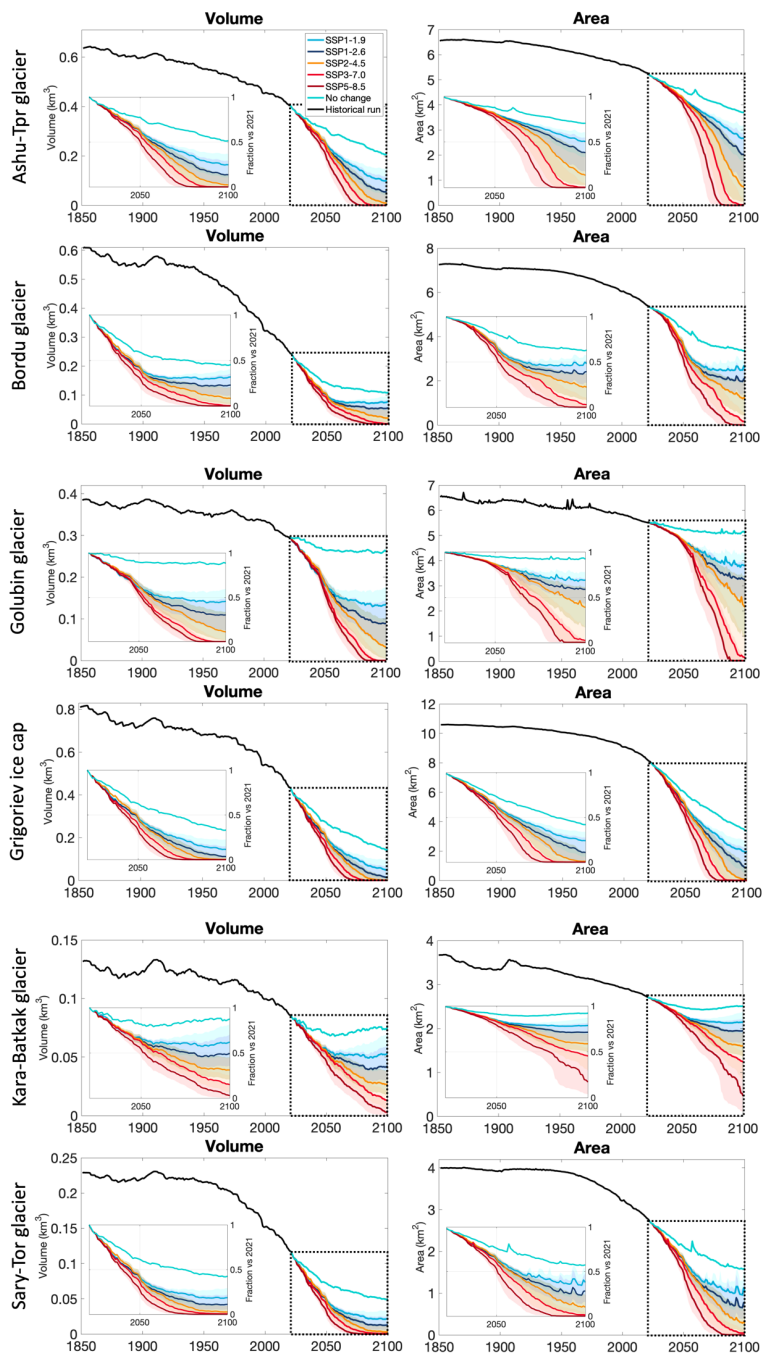

Figure 7: Historical and future evolution of the ice volume and area. The insets show the future ice volume and area with respect to 2021.

1000

1005

1010

1015

The pronounced susceptibility of the studied ice masses to climate change can be attributed to the specific climatic conditions in the region. The ice masses in the Tien Shan are spring-summer accumulation type of glaciers (Aizen et al., 2006; Fujita, 2008; Van Tricht et al., 2021b), which means that the accumulation is more sensitive to temperature changes. The air temperature in spring and summer both affects the duration and intensity of melt as well as the type of precipitation, in contrast to glaciers and ice caps with accumulation centred on winter, for which temperatures remain (to date) low enough for solid precipitation. This ensures that warming on winter-type glaciers mainly prolongs and intensifies the melting period without significantly changing accumulation and the average albedo (Aizen et al., 2006; Fujita, 2008). Next to that, in the Tien Shan, the episodic solid precipitation events between May and September preserve the ice from intense melting by increasing the surface albedo which interrupts the melting season temporarily (Kronenberg et al., 2016; Che et al., 2019). However, increasing temperatures in spring and summer increase melting and reduce the surface albedo as more precipitation falls in liquid state. The Golubin and Kara-Batkak glaciers, characterised by higher precipitation amounts and, in the case of the former, enhanced winter precipitation, exhibit comparatively lower temperature sensitivity when compared to the other glaciers. Consequently, these glaciers are projected to retain a significant portion of their ice volume under a moderate warming scenario by the end of the century.

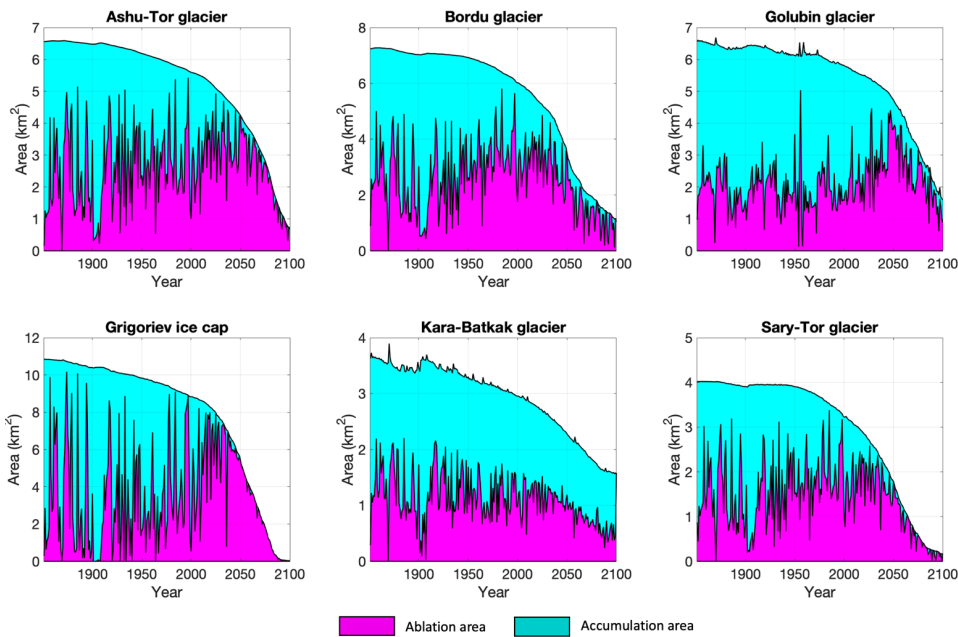

Figure 8: Evolution of the accumulation area and the ablation area under SSP2-4.5 for the different ice masses.

## 5.2 Ice masses in 2100

1020

The ice masses in 2100 are clearly smaller than the present-day geometries in all scenarios (Figure 9). Nevertheless, it is clear that, depending on the scenario, more or less ice will remain by the end of the 21<sup>st</sup> century. For the optimistic SSP1-1.9 and SSP1-2.6 scenarios, most ice masses maintain (individual) patches of ice in the upper areas. After the retreat of the ice, the

heeft verwijderd: In the case of a constant 2001-2021 mean climate, the Ashu-Tor, Bordu and Sary-Tor glaciers as well as the Grigoriev ice cap retreat strongly with a volume of 40-50% of the present-day volume remaining by 2100 (Figure 7). This shows the current imbalance of these ice masses with a large, committed ice loss. The loss of the Golubin and the Kara-Batkak glacier under the 2001-2021 climate is much lower which means that these ice masses currently have a volume and area that is more in balance with the current climatic conditions.

heeft verwijderd: strong sensitivity

heeft verwijderd: explained

heeft verwijderd: by

heeft verwijderd: te regime

heeft verwijderd: ; Van Tricht et al., 2021b

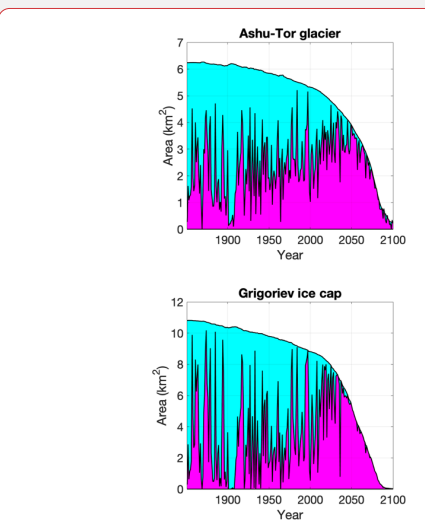

heeft verwijderd:

... [34]

heeft verwijderd: , except for the Grigoriev ice cap which collapses (almost) completely

bedrock will appear. As the 2-d profiles in the inset already show, there are several (small) depressions in the bedrock that have been scoured by years of ice erosion (Figure 9). In these bedrock depressions, which will eventually become free of ice, it is very likely that (proglacial) lakes will form (Furian et al., 2022; Compagno et al., 2022). Their formation might accelerate frontal retreat by hydrostatic lifting of the frontal area (Carrivick et al., 2020).

heeft verwijderd:

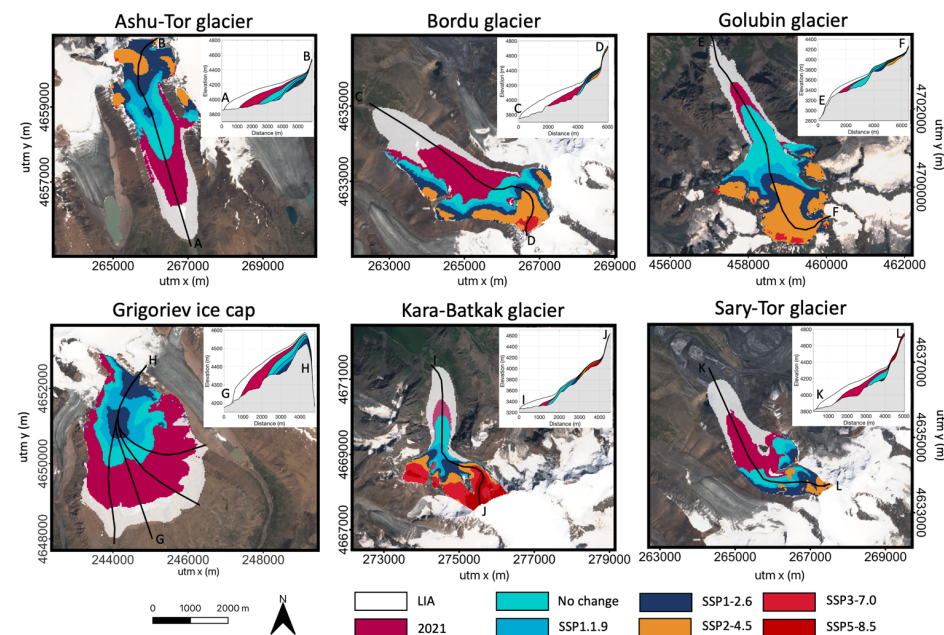

**Figure 9:** Extent of the ice masses at the end of the Little Ice Age (LIA), in 2021 and in 2100 under different climatic scenarios. The inset shows the bedrock and surface profile along the main flowlines indicated by the black lines on the respective maps. The background satellite images are from Sentinel-2 data acquired in July/August 2021.

heeft verwijderd:

Met opmaak: Kleurrijke lijst - accent 11, Centrum, Regelfstand: enkel

### 5.3 Runoff

The melting of the ice masses in the Tien Shan, which will accelerate in the coming decades (Figure 7) will lead to profound changes in the runoff. To analyse the projected evolution in the runoff originating from the different ice masses, the annual total runoff is calculated following the approach of Huss and Hock (2018) and Rounce et al. (2019). The runoff ( $r_{tot}$ ) is defined as all water that leaves the initial (LIA) glacierised area in one year. This is computed from the difference between the total precipitation ( $P_{tot}$ ) and the mass balance within that area. As such, in the ablation area, the total runoff is the sum of the total precipitation and the glacier meltwater. In the accumulation area and outside the ice masses, it is equal to the total precipitation minus the snow/refrozen water present at the end of the year. Defining the runoff as in Eq. 9 is equivalent to the runoff that would be measured at a fixed gauge at the LIA glacier terminus (Rounce et al., 2019).

$$r_{tot} = \sum_{x,y} (P_{tot}[x,y] - m_{s_i}[x,y]) \quad (9)$$

The results show that after an initial increase in the total annual runoff, the continuous retreat of the ice masses leads to a significant decrease in runoff during the second half of the 21<sup>st</sup> century, except for the Kara-Batkak glacier (Figure 10). A peak

heeft verwijderd:

in the total runoff is expected to be reached before or around 2050 in all scenarios. Higher SSP-scenarios clearly have a higher peak due to the increased excess glacier meltwater, which corresponds to the additional runoff due to annual glacier net mass loss. However, this peak is shorter, occurs earlier, and a drastic decrease in total runoff follows afterwards. By contrast, the Kara-Batkak glacier does not exhibit a distinct peak in total runoff.

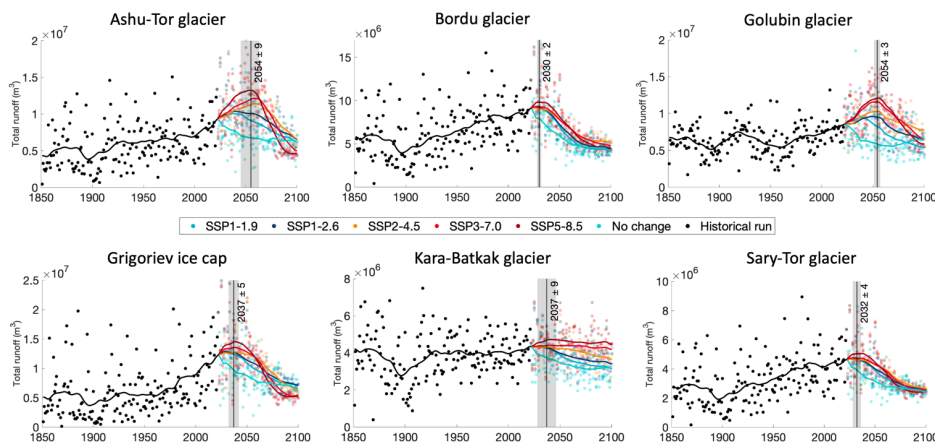

**Figure 10:** Annual total runoff from the initially (Little Ice Age) glacierised area under different climate scenarios. The points represent the modelled total runoff in every year while the solid line is the 20 year moving average. The indicated year of peak runoff is determined by calculating the average year of the maximum total runoff under SSP1-2.6, SSP2-4.5, SSP3-7.0 and SSP5-8.5, while the grey area corresponds to  $\pm$  the standard deviation of these years.

Compared to the 2015-2021 average, the total runoff is shown to be reduced on average by 50% by the end of the 21<sup>st</sup> century in all scenarios, except for the Golubin and the Kara-Batkak glaciers for which the total runoff remains larger (Figure 10). It is beyond the focus of this study, but the timing and intensity of runoff during the year also changes, with the peak runoff occurring earlier in the year (Rounce et al., 2019). This is because glacial meltwater is a more gradual source of runoff during spring and summer, while runoff from rain/snow is more intense and temporary. During the 21<sup>st</sup> century, the proportion of ice melt decreases as the ice masses all become significantly smaller in all scenarios. Therefore, the glacial-nival regimes in the region will eventually transform into nival-pluvial regimes with larger year-to-year variability (Braun and Hagg, 2009; Sorg et al., 2013).

## 6 Discussion and outlook

### 6.1 Uncertainty and limitations

The applied methods and the obtained results comprise several uncertainties and limitations which need to be noted. The first set of uncertainties and limitations is related to the observational part of the climatological series, i.e. the temperature and precipitation data used to force the mass balance model from 1850 to 2021. To force the mass balance model, preference was given to local data obtained from meteorological stations in the proximity of the glaciers. However, it should be acknowledged that these local stations may not always accurately capture the conditions prevailing at the glaciers themselves, particularly when there exists a substantial distance between the weather stations and the glaciers. With regard to air temperature, correlations are likely to be reliable over longer distances. Nonetheless, the heterogeneous topography and varied climatological conditions signify that the treatment of precipitation constitutes the primary source of uncertainty in the mass

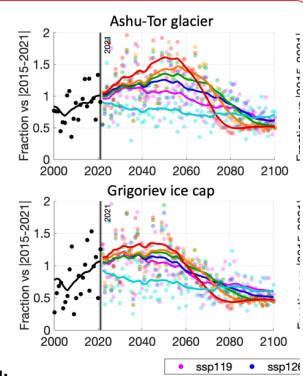

heeft verwijderd:

heeft verwijderd: 1

heeft verwijderd: 1

heeft verwijderd: 1

heeft verwijderd: 1

**Met opmaak:** Meerdere niveaus + Niveau: 1 + Nummeringstijl: 1, 2, 3, ... + Beginnen bij: 5 + Uitlijning: Links + Uitgelijnd op: 0 cm + Inspringen op: 0.63 cm

**heeft opmaak toegepast:** Lettertype: (Standaard) +Hoofddektst (Times New Roman), Tekstkleur: Tekst 1, Afspatiëren op 16 pt

**heeft opmaak toegepast:** Lettertype: (Standaard) +Hoofddektst (Times New Roman), Tekstkleur: Tekst 1, Afspatiëren op 16 pt

**heeft opmaak toegepast:** Lettertype: (Standaard) +Hoofddektst (Times New Roman), Tekstkleur: Tekst 1, Afspatiëren op 16 pt

**heeft opmaak toegepast:** Lettertype: (Standaard) +Hoofddektst (Times New Roman), Tekstkleur: Tekst 1, Afspatiëren op 16 pt

**heeft opmaak toegepast:** Lettertype: (Standaard) +Hoofddektst (Times New Roman), Tekstkleur: Tekst 1, Afspatiëren op 16 pt

**heeft opmaak toegepast:** Lettertype: (Standaard) +Hoofddektst (Times New Roman), Tekstkleur: Tekst 1, Afspatiëren op 16 pt

**heeft opmaak toegepast:** Lettertype: (Standaard) +Hoofddektst (Times New Roman), Tekstkleur: Tekst 1, Afspatiëren op 16 pt



balance calculation. This would however also be the case if a reanalysis product were used (De Kok et al., 2020; Barandun and Pohl, 2023). Nevertheless, it is worth noting that our ability to reproduce the present state of ice masses using the local data is demonstrated by the absence of any precipitation or temperature bias for the recent decades.

For the future projections, a multi-model mean was created based on all available GCMs covering the study area. To do this, anomalies with respect to overlapping periods between the GCMs and observations were used and transposed to the future. Although a multi-model mean is beneficial because biases in individual models are less prominent, the use of regional climate models such as CORDEX, or downscaled products, might show additional smaller scale details and variations (Rana et al., 2020). These small-scale variations, which depend on local elevation and topography, are not included in the forcing of the future but might influence the evolution of the studied ice masses. Nevertheless, a recent study considering glacier evolution in Iceland and Scandinavia pointed out that climate forcing products were only of minor importance for future glacier projections, as opposed to accurate model calibration data at the glacier-specific scale (Compagno et al., 2021). Moreover, Marzeion et al. (2020) demonstrated that the influence of GCM uncertainty in Central Asia typically diminishes during the second half of the century, with the primary driver of uncertainty shifting towards the uncertainty associated with the emission scenarios.

Other limitations are related to the simplicity of the mass balance model in which different processes such as refreezing and sublimation are not included as independent processes but parametrised as a part of accumulation and ablation. Besides, it must be stated that the mass balance model of the Ashu-Tor glacier is strongly based on the calibrated parameters of nearby glaciers, as direct mass balance measurements were only performed for a limited period in time and for a limited altitudinal extent. This might also be the reason of the mismatch with the geodetic mass balance of Hugonnet et al. (2021). We specifically want to highlight that given the highly variable precipitation gradient, which is for example evident from the difference of the precipitation gradient between the Bordu glacier and the Grigoriev ice cap, modelled mass balances in the accumulation area of this glacier are characterised by a larger uncertainty.

The uncertainties and limitations in the performance of the ice flow model are mainly related to the calibration of the enhancement factor and basal sliding parameter, as well as internal ice temperatures. The englacial temperatures were derived using constants for the snow insulation and firn warming to parametrise the surface layer warming as derived in Van Tricht and Huybrechts (2022). However, these constants were only calibrated based on ice temperature data of the Grigoriev ice cap. Nevertheless, validation with GPR-measurements showed a close match for Sary-Tor glacier as well, which increases our confidence that the derived values can be transferred to other glaciers in the region as well. The calibration of the ice flow and basal sliding parameter involved minimising the differences between the modelled ice thickness and velocities and their corresponding observed values. Nonetheless, these observations also comprise an inherent level of uncertainty, and various combinations produced similar root mean square error (RMSE) values. We obtained values within a comparable range for the difference ice masses. However, the direct calculation of ice temperatures encompasses discrepancies in flow parameters and the existence or non-existence of basal sliding (temperate vs cold ice over the bed). For Kara-Batkak, we found a larger RMSE between modelled and observed velocities, which was mainly caused by stakes with strong displacement near the margin (Figure 6). It is possible that our model did not fully resolve glacier dynamics in this part of the glacier with the prescribed parameter combination.

heeft opmaak toegepast: Lettertype: (Standaard)  
+Hoofdstekst (Times New Roman), Tekstkleur: Tekst 1,  
Afspariëren op 16 pt

heeft opmaak toegepast: Lettertype: (Standaard)  
+Hoofdstekst (Times New Roman), Tekstkleur: Tekst 1,  
Afspariëren op 16 pt

heeft opmaak toegepast: Lettertype: (Standaard)  
+Hoofdstekst (Times New Roman), Tekstkleur: Tekst 1,  
Afspariëren op 16 pt

heeft verwijderd: i

heeft verwijderd: also

heeft verwijderd: f

f  
Regarding

heeft verwijderd: t

heeft verwijderd: , it must be stated that we used the same

heeft verwijderd: ,

heeft verwijderd: f

## 6.2. Evolution of the thermal structure

In our model, we consider the full thermodynamics between 1851 and 2100. Consequently, we also provide an examination of the proportion of temperate ice across the various ice masses from 1851 to 2100 under the SSP2-4.5 scenario (Figure 11). Our findings reveal distinct thermal regimes across the six ice masses. The Golubin and Kara-Batkak glaciers exhibit a temperate nature due to their slightly lower elevation, resulting in higher mean annual temperatures, and larger amounts of precipitation. The greater insulation provided by snow accumulation and a larger volume of refrozen meltwater contribute to enhanced surface warming in these glaciers. In contrast, the Grigoriev ice cap remains consistently cold, as previously demonstrated by Van Tricht and Huybrechts (2022). The Ashu-Tor, Bordu, and Sary-Tor glaciers display a polythermal structure, whereby the proportion of temperate ice gradually diminishes over the course of the 21st century (Figure 11). This decrease can primarily be attributed to the glacier thinning, retreat to higher elevations, and overall shrinkage. This was also observed for other polythermal glaciers (Willis et al., 2007). Although we anticipate that these changes in the fraction of temperate ice influence glacier dynamics, specifically the transition of lower layers from temperate to cold ice, our study does not delve into a detailed investigation of these dynamics. Nevertheless, we expect a general decrease in velocities when basal sliding becomes smaller or ceases. Future studies could focus on disentangling the influence of considering full thermodynamics on the future evolution.

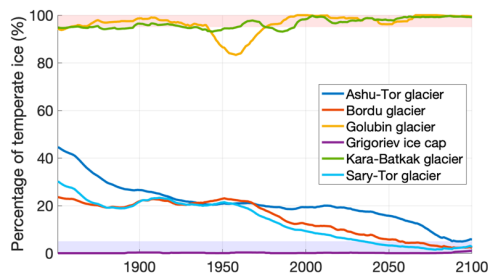

**Figure 11:** Evolution of the percentage of temperate ice for the six ice masses between 1851 and 2100 under SSP2-4.5. The data is smoothed over a period of 10 years. The red area corresponds to > 95% temperate ice, the grey area to 5-95% temperate ice and the purple area to < 5% temperate ice.

## 6.3. Heterogeneous response of the different ice masses

According to our research, the six ice masses examined exhibit a heterogeneous response to climate change, which can be attributed to their distinct topographical and climatological settings. Specifically, Kara-Batkak and Golubin were found to retain the largest proportion of their ice volume among all six ice masses. This finding is not surprising, given that these glaciers receive higher amounts of precipitation, particularly in winter and spring, compared to the other four ice masses where precipitation is lower and concentrated in late spring and the summer months. Consequently, increasing temperatures in the latter lead to a rise in melt and a decline in accumulation. On the other hand, the ice masses' heterogeneous response can also be attributed to their topographical settings. For instance, the Grigoriev ice cap has a restricted altitudinal range of only 400 meters, making it highly vulnerable to climate change. Conversely, the Kara-Batkak glacier spans over 1300 meters. Our findings can contribute to the investigation of the heterogeneous impact of climate change on glaciers in the Tien Shan region.

heeft opmaak toegepast: Lettertype: Vet

heeft opmaak toegepast: Lettertype: Vet

heeft opmaak toegepast: Lettertype: (Standaard) Times New Roman, Niet Vet

Met opmaak: Uitvullen

heeft opmaak toegepast: Lettertype: (Standaard) Times New Roman, Niet Vet

heeft verwijderd: ¶

heeft opmaak toegepast: Lettertype: 10 pt

heeft verwijderd: ¶

Met opmaak: Kleurrijke lijst - accent 11

## 7 Conclusion

In this study, we modelled the historical and future evolution of six ice masses in the western part of the Tien Shan mountains, High Mountain Asia, using a 3-dimensional higher-order ice flow model coupled to a surface energy mass balance model. The models were calibrated with surface mass balance measurements, length reconstructions and ice thickness data. Data from tree rings and weather stations in the vicinity of the ice masses served as meteorological input data for the past. For the Golubin glacier, precipitation data of ERA5 were used as well. Subsequently, different CMIP6 SSP scenarios were considered for the future projections up to 2100 as well as a no change scenario keeping the average climatic conditions of 2001-2021 constant.

By implementing minor temperature and/or precipitation biases to account for uncertainties in the mass balance model and discrepancies in the climatic records, specifically for the historical period characterised by less reliable climate information, we were able to successfully reproduce the retreat of the ice masses from the Little Ice Age (1850) to 2021. Validations with geodetic mass balances showed generally a close correspondence. The results highlight a strong increase of the retreat of the ice masses in recent decades.

The projections of the ice masses up to 2100 reveal that under all climate scenarios, the ice masses become significantly smaller. Under the SSP5-8.5 scenario, most of the ice masses disappear altogether, except for the Kara-Batkak glacier which appears to be able to maintain small ice patches at the highest elevations. The Grigoriev ice cap shows the strongest climate sensitivity, disappearing in almost every climate scenario. This could be explained by the small ice cap instability, with the equilibrium line rising above the top of the ice cap even in the most optimal climate scenario. Besides, the studied ice masses appear to be particularly sensitive to climate change because the accumulation is centred on spring and early summer. Hence, temperature rises in these seasons do not only amplify melting but also reduce the solid part of the precipitation and the average albedo. Projections of the total annual runoff from the LIA glacierised catchment show that the peak water will be reached before the mid of the 21<sup>st</sup> century and that the intensity of this peak depends on the climate scenario, with a higher warming scenario having a larger peak.

The availability of a comprehensive set of accurate direct measurements allowed us to study in detail a sample of six ice masses in the Tien Shan. The different geometries and climatic settings of the ice bodies additionally permitted analysis of why certain ice masses disappear faster (e.g. the Grigoriev ice cap) or can survive (e.g. the Kara-Batkak glacier). In a next step, it would be interesting to compare the results of this study to the outcomes of simpler regional models providing ice volume evolutions for all glaciers in the study area. This can give an inside in the added-value of using higher-order models and a more detailed representation of the thermal regime and it will allow to assess the value and quality of larger-scale models that are required for regional studies of ice volume evolution.

## 8 Code availability

Information and specific details about the model code will be specified on request by Lander Van Tricht.

## 9 Author contributions

LVT collected the input data, prepared the climate scenarios, performed the experiments, and wrote the manuscript. PH provided the model code, gave guidance in implementing the research and interpreting the results, and assisted with writing the manuscript.

heeft verwijderd:

heeft verwijderd: Using small mass balance adjustments accounting

heeft verwijderd: errors

heeft verwijderd: historical

heeft verwijderd: between

heeft verwijderd: and

heeft verwijderd: could be closely reproduced

heeft verwijderd: present day observations

heeft verwijderd: show

heeft verwijderd: clear

heeft verwijderd: and

heeft verwijderd: .

heeft verwijderd: ing

heeft verwijderd: during the entire proc

heeft verwijderd: css

heeft verwijderd: ¶

## 10 Competing interests

The contact author has declared that none of the authors has any competing interests.

heeft verwijderd: 

## 11 Acknowledgements

The authors would like to thank everyone who contributed to the fieldwork to carry out the ice thickness measurements and the drone surveys. We would also like to specifically thank Oleg Rybak and Rysbek Satylkanov for assisting and organising the fieldwork. We thank Victor Popovnin for providing mass balance data. We are also grateful to the Kumtor Gold Mine for allowing us to perform glacier measurements on their concession.

## 12 Financial support

Lander Van Tricht holds a PhD fellowship of the Research Foundation – Flanders (FWO-Vlaanderen) and is affiliated with the Vrije Universiteit Brussel (VUB). Logistics for fieldwork on the glaciers were mainly organised and funded by the Tien Shan High Mountain Research Center and the Kumtor mining company.

## 13 References

Aizen, V.B., Maksimov, N.V. and Solodov, P.A.: Dynamieaenednika Golubina za poslednie 20 let [Dynamic of the Golubina Glacier for the 20 last years]. Trudi Central'no-Asiatskogo Regional'nogo Nauchno-Issledovatel'skogo Instituta [Works of Central Asian Regional Institute of Science Investigations, Tashkent], 91(172), 1983

Aizen, V. B., Aizen, E. M., and Melack, J. M.: Climate, Snow Cover, Glaciers, and Runoff in the Tien Shan, Central Asia, J. Am. Water Resour. As., 31, 1113–1129, <https://doi.org/10.1111/j.1752-1688.1995.tb03426.x>, 1995.

Aizen, V. B., Kuzmichenok, V., Surazakov, A., and Aizen, E. M.: Glacier changes in the central and northern Tien Shan during the last 140 years based on surface and remote-sensing data, *Annals of Glaciology*, 43, 202–213, <https://doi.org/10.3189/172756406781812465>, 2006.

heeft verwijderd: .

heeft verwijderd: .

Aizen, V.B., Kuzmichenok, V.A., Surazakov, A.B. and Aizen, E.M.: Glacier Changes in the Tien Shan as Determined from Topographic and Remotely Sensed Data. Glob. Planet. Change 56, 328–340.

<https://doi.org/10.1016/j.gloplacha.2006.07.016>, 2007

heeft opmaak toegepast: Tekstkleur: Tekst 1

Arkipov, S. M., Mikhalenko, V. N., Kunakhovich, M. G., Dikikh, A. N., and Nagornov, O. V.: Termich eskii rezhim, usloviia l'doobrazovaniia i akkumulyatsiia na ladnike Grigor'eva (Tyan'-Shan') v 1962–2001 gg. [Thermal regime, ice types and accumulation in Grigoriev Glacier, Tien Shan, 1962–2001], Mater. Glyatsiol. Issled., 96, 77–83, 2004 (in Russian with English summary).

Azisov, E., Hoelzle, M., Vorogushyn, S., Saks, T., Usabaliev, R., Esenaman uulu, M. and Barandun, M.: Reconstructed Centennial Mass Balance Change for Golubin Glacier, Northern Tien Shan. Atmosphere 2022, 13, 954.

<https://doi.org/10.3390/atmos13060954>, 2022

heeft opmaak toegepast: Tekstkleur: Tekst 1

Barandun, M., Huss, M., Usabaliev, R., Azisov, E., Berthier, E., Kääb, A., Bolch, T., and Hoelzle, M.: Multi-decadal mass balance series of three Kyrgyz glaciers inferred from modelling constrained with repeated snow line observations, *The Cryosphere*, 12, 1899–1919, <https://doi.org/10.5194/tc-12-1899-2018>, 2018.

Barandun, M., Pohl, E., Naegeli, K., McNabb, R., Huss, M., Berthier, E., Saks, T. and Hoelzle, M.: Hot spots of glacier mass balance variability in Central Asia. *Geophysical Research Letters*, 2021, vol. 48, no 11, <https://doi.org/10.1029/2020GL092084>, 2021.

Barandun, M. and Pohl, E.: Central Asia's spatiotemporal glacier response ambiguity due to data inconsistencies and regional simplifications, *The Cryosphere*, 17, 1343–1371, <https://doi.org/10.5194/tc-17-1343-2023>, 2023.

Blondin, R., Stroeve, A.P., Harbor, J.M., Lifton, N.A., Heyman, J., Gribenski, N., Petrakov, D.A., Caffee, M.W., Ivanov, M.N., Hättestrand, C., Rogozhina, I. and Usabaliev R.: Evaluating the timing of former glacier expansions in the Tian Shan: A key step towards robust spatial correlations. *Quaternary Science Reviews*, 153, 78–96, <https://doi.org/10.1016/j.quascirev.2016.07.029>, 2016.

Bolch, T.: Glacier area and mass changes since 1964 in the Ala Archa Valley, Kyrgyz Ala-Too, northern Tien Shan. *Led i Sneg*, 129(01):28–39, <https://doi.org/10.5167/uzh-117189>, 2015.

Braun, L. N. and Hagg, W. Present and future impact of snow cover and glaciers on runoff from mountain regions - comparison between Alps and Tien Shan. *Assess. Snow Glacier Water Resources Asia* 8, 36–43, <https://doi.org/10.5282/ubm/epub.13807>, 2009.

Brun, F., Berthier, E., Wagnon, P., Kääb, A. and Treichler, D.: A spatially resolved estimate of High Mountain Asia glacier mass balances from 2000 to 2016. *Nat. Geosci.* 10, 668–673, <https://doi.org/10.1038/ngeo2999>, 2017.

Carrivick, J. L., Tweed, F. S., Sutherland, J. L. and Mallalieu, J.: Toward Numerical Modeling of Interactions between Ice-Marginal Proglacial Lakes and Glaciers. *Front. Earth Sci.* 8 (500), 68, <https://doi.org/10.3389/feart.2020.577068>, 2020.

Che, Y., Zhang, M., Li, Z., Wei, Y., Nan, Z., Li, H., Wang, S. and Su, B.: Energy balance model of mass balance and its sensitivity to meteorological variability on Urumqi River Glacier No.1 in the Chinese Tien Shan. *Sci Rep*, 9, 13958, <https://doi.org/10.1038/s41598-019-50398-4>, 2019.

Christian, J. E., Koutnik, M. and Roe, G.: Committed retreat: Controls on glacier disequilibrium in a warming climate. *Journal of Glaciology*, 64, 675–688, <https://doi.org/10.1017/jog.2018.57>, 2018.

Compagno, L., Zekollari, H., Huss, M. and Farinotti, D.: Limited impact of climate forcing products on future glacier evolution in Scandinavia and Iceland. *Journal of Glaciology*, 67(264), 727–743, <https://doi.org/10.1017/jog.2021.24>, 2021.

Compagno, L., Huss, M., Zekollari, H. and Farinotti, D.: Future growth and decline of high mountain Asia's ice-dammed lakes and associated risk. *Commun Earth Environ* 3, 191, <https://doi.org/10.1038/s43247-022-00520-8>, 2022.

heeft verwijderd: .

heeft opmaak toegepast: Tekstkleur: Tekst 1

heeft opmaak toegepast: Niet onderstrepen, Tekstkleur: Tekst 1

heeft verwijderd: ¶

heeft opmaak toegepast: Tekstkleur: Tekst 1

- de Kok, R. J., Kraaijenbrink, P. D. A., Tuinenburg, O. A., Bonekamp, P. N. J., and Immerzeel, W. W.: Towards understanding the pattern of glacier mass balances in High Mountain Asia using regional climatic modelling, *The Cryosphere*, 14, 3215–3234, <https://doi.org/10.5194/tc-14-3215-2020>, 2020
- Dikikh, A. N.: Temperature regime of flat-top glaciers (using Grigoriev as an Example) – Glyatsiol. Issledovaniya na Tyan-Shane, Frunze, N. 11, 32–35, 1965 (in Russian).
- Dyurgerov, M. B.: Glacier mass balance and regime: data of measurements and analysis, University of Colorado Institute of Arctic and Alpine Research Occasional Paper 55, Boulder, [http://instaar.colorado.edu/other/occ\\_papers.html](http://instaar.colorado.edu/other/occ_papers.html) (last access: 17 October 2022), 2002
- Farinotti, D., Longuevergne, L., Moholdt, G., Duethmann, D., Mölg, T., Bolch, T. and Vorogushyn, S.: Güntner, A. Substantial glacier mass loss in the Tien Shan over the past 50 years. *Nature Geoscience*, 8, 716–722, <https://doi.org/10.1038/ngeo2513>, 2015
- Fujita, K.: Influence of precipitation seasonality on glacier mass balance and its sensitivity to climate change. *Annals of Glaciology*, 48, 88–92. <https://doi.org/10.3189/172756408784700824>, 2008
- Fujita, K., Takeuchi, N., Nikitin, S. A., Surazakov, A. B., Okamoto, S., Aizen, V. B., and Kubota, J.: Favorable climatic regime for maintaining the present-day geometry of the Grigoriev Glacier, Inner Tien Shan, *The Cryosphere*, 5, 539–549, <https://doi.org/10.5194/tc-5-539-2011>, 2011
- Furian, W., Maussion, F. and Schneider, C.: Projected 21st-century glacial lake evolution in High Mountain Asia. *Front. Earth Sci.*, 10, <https://doi.org/10.3389/feart.2022.821798>, 2022
- Fürst, J. J., Rybak, O., Goelzer, H., De Smedt, B., de Groen, P., and Huybrechts, P.: Improved convergence and stability properties in a three-dimensional higher-order ice sheet model, *Geosci. Model Dev.*, 4, 1133–1149, <https://doi.org/10.5194/gmd-4-1133-2011>, 2011
- Fürst, J. J., Goelzer, H., and Huybrechts, P.: Effect of higher-order stress gradients on the centennial mass evolution of the Greenland ice sheet, *The Cryosphere*, 7, 183–199, <https://doi.org/10.5194/tc-7-183-2013>, 2013
- Gan, R., Luo, L., Zuo, Q. and Sun, L.: Effects of projected climate change on the glacier and runoff generation in the Naryn River Basin, Central Asia *J. Hydrol.*, 523, 240–251, <https://doi.org/10.1016/j.jhydrol.2015.01.057>, 2015
- Goerlich, F., Bolch, T., Mukherjee, K. and Pieczonka, T.: Glacier Mass Loss during the 1960s and 1970s in the Ak-Shirak Range (Kyrgyzstan) from Multiple Stereoscopic Corona and Hexagon Imagery. *Remote Sensing* 9 (3), 275, <https://doi.org/10.3390/rs9030275>, 2017
- Hagg, W., Braun, L.N., Weber, M. and Becht, M.: Runoff modelling in glacierized central Asian catchments for present-day and future climate. *Hydrology Research*, 37(2), 93–105, <https://doi.org/10.2166/nh.2006.0008>, 2006

heeft opmaak toegepast: Tekstkleur: Tekst 1



395 Hausfather, Z., Marvel, K., Schmidt, G.A., Nielsen-Gammon, J.W. and Zelinka, M.: Climate simulations: Recognize the 'hot model' problem. *Nature*, 605:26–29, <https://doi.org/10.1038/d41586-022-01192-2>, 2022

1400 Hoelzle, M., Azisov, E., Barandun, M., Huss, M., Farinotti, D., Gafurov, A., Hagg, W., Kenzhebaev, R., Kronenberg, M., Machguth, H., Merdoshkin, A., Moldobekov, B., Petrov, M., Saks, T., Salzmänn, N., Schöne, T., Tarasov, Y., Usabaliev, R., Vorogushyn, S., Yakovlev, A., and Zemp, M.: Re-establishing glacier monitoring in Kyrgyzstan and Uzbekistan, Central Asia, *Geosci. Instrum. Method. Data Syst.*, 6, 397–418, <https://doi.org/10.5194/gi-6-397-2017>, 2017.

405 Hoelzle, M., Barandun, M., Bolch, T., Fiddes, J., Gafurov, A., Muccione, V., Saks, T. and Shahgedanova, M.: The status and role of the alpine cryosphere in Central Asia. In *The Aral Sea Basin*. Taylor & Francis, <https://doi.org/10.4324/9780429436475-8>, 2019

Hugonnet, R., McNabb, R., Berthier, E., Menounos, B., Nuth, C., Girod, L., Farinotti, D., Huss, M., Dussaillant, I., Brun, F., and Käb, A.: Accelerated global glacier mass loss in the early twenty-first century. *Nature*, 592, 726–731. <https://doi.org/10.1038/s41586-021-03436-z>, 2021

1410 Huss, M. and Hock, R.: Global-scale hydrological response to future glacier mass loss. *Nature Clim Change* 8, 135–140, <https://doi.org/10.1038/s41558-017-0049-x>, 2018

1415 Hutter, K. (1983). *Theoretical glaciology* (Vol. 1). Reidel Publ. Co, Dordrecht.

Huybrechts, P. A 3-D model for the Antarctic ice sheet: a sensitivity study on the glacial-interglacial contrast. *Climate Dynamics* 5, 79–92, <https://doi.org/10.1007/BF00207423>, 1990

420 Immerzeel, W.W., Van Beek, L.P. and Bierkens, M.F.: Climate change will affect the Asian water towers. *Science*, 328, 346 1382–1385, <https://doi.org/10.1126/science.1183188>, 2010.

Jóhannesson, T., Raymond, C. and Waddington, E.: Time-Scale for Adjustment of Glaciers to Changes in Mass Balance. *Journal of Glaciology*, 35(121), 355–369. <https://doi.org/10.3189/S002214300000928X>, 1989

1425 Juvet, G., Huss, M., Funk, M., and Blatter, H.: Modelling the retreat of Grosser Aletschgletscher, Switzerland, in a changing climate, *J. Glaciol.*, 57, 1033–1045, <https://doi.org/10.3189/002214311798843359>, 2011

430 Kraaijenbrink, P., Bierkens, M., Lutz, A. and Immerzeel W.W.: Impact of a global temperature rise of 1.5 degrees Celsius on Asia's glaciers. *Nature*, 549, 257–260, <https://doi.org/10.1038/nature23878>, 2017

Kronenberg, M., Barandun, M., Hoelzle, M., Huss, M., Farinotti, D., Azisov, E., Usabaliev, R., Gafurov, A., Petrakov, D. and Käb, A.: Mass-balance reconstruction for Glacier No. 354, Tien Shan, from 2003 to 2014. *Annals of Glaciology*, 57(71), 92–102, <https://doi.org/10.3189/2016AoS71A032>, 2016

435 Kutuzov, S. and Shahgedanova, M.: Glacier retreat and climatic variability in the eastern Terskey–Alatau, inner Tien Shan between the middle of the 19th century and beginning of the 21st century. *Global and Planetary Change*, 69 (1–2), 59–70, <https://doi.org/10.1016/j.gloplacha.2009.07.001>, 2009

heeft verwijderd: .

heeft opmaak toegepast: Tekstkleur: Tekst 1

Met opmaak: Links, Regelaafstand: 1.5 regel

heeft opmaak toegepast: Niet onderstrepen, Tekstkleur: Tekst 1

heeft verwijderd: ¶

heeft opmaak toegepast: Tekstkleur: Tekst 1

heeft opmaak toegepast: Tekstkleur: Tekst 1

heeft opmaak toegepast: Tekstkleur: Tekst 1

heeft verwijderd: ¶

Kraaijenbrink, P., Bierkens, M., Lutz, A. and Immerzeel W.W.: Impact of a global temperature rise of 1.5 degrees Celsius on Asia's glaciers. *Nature*, 549, 257–260, <https://doi.org/10.1038/nature23878>, 2017¶

Li, Y., Lu, X. and Li, Y.: A Review on the Little Ice Age and Factors to Glacier Changes in the Tian Shan, Central Asia. In book: *Glaciers Evolution in a Changing World* (October). Vienna, Austria: IntechOpen. <https://doi.org/10.5772/intechopen.70044>, 2017¶

Huss, M. and Hoek, R.: Global-scale hydrological response to future glacier mass loss. *Nature Climate Change*, *Nature*, 8 (2), 135–140, <https://doi.org/10.1038/s41558-017-0049-x>, 2018¶

heeft opmaak toegepast: Tekstkleur: Tekst 1

heeft opmaak toegepast: Tekstkleur: Tekst 1

heeft opmaak toegepast: Tekstkleur: Tekst 1

heeft opmaak toegepast: Niet onderstrepen, Tekstkleur: Tekst 1

1455

Li, Y., Lu, X. and Li, Y.: A Review on the Little Ice Age and Factors to Glacier Changes in the Tian Shan, Central Asia. In book: *Glaciers Evolution in a Changing World* (October). Vienna, Austria: IntechOpen. <https://doi.org/10.5772/intechopen.70044>, 2017

heeft opmaak toegepast: Tekstkleur: Tekst 1

heeft verwijderd: ¶

1460

Mikhalev, V. N.: Osobennosti massobmena lednikov ploskikh vershin vnutrennego Tyan'-Shanya [Peculiarities of the mass exchange of flat summit glaciers of interior Tyan'-Shan], *Materialy Glyatsiologicheskikh Issledovaniy*, 65, 86–92, 1989 (in Russian)

1465

Narama, C., Daiyrov, M., Duishonakunov, M., Tadono, T., Sato, H., Kääb, A., Ukita, J., and Abdrakhmatov, K.: Large drainages from short-lived glacial lakes in the Teskey Range, Tien Shan Mountains, Central Asia. *Natural Hazards and Earth System Sciences*, 18, 983–995, <https://doi.org/10.5194/nhess-18-983-2018>, 2018.

heeft opmaak toegepast: Tekstkleur: Tekst 1

1470

Pattyn, F.: A new three-dimensional higher-order thermomechanical ice sheet model: Basic sensitivity, ice stream development, and iceflow across subglacial lakes, *J. Geophys. Res.*, 108, B82382, <https://doi.org/10.1029/2002JB002329>, 2003

Petrakov, D. A., Lavrientiev, I. I., Kovalenko, N. V., and Usualiev, R. A.: Ice thickness, volume and modern change of the Sary-Tor Glacier area (Ak-Shyirak Massif, Inner Tian Shan), *Earth's Cryosphere*, 18, 91–100, 2014.

1475

Pieczonka, T. and Bolch, T.: Region-wide Glacier Mass Budgets and Area Changes for the Central Tien Shan between ~1975 and 1999 Using Hexagon KH-9 Imagery. *Glob. Planet. Change* 128, 1–13. <https://doi.org/10.1016/j.gloplacha.2014.11.014>, 2015

heeft opmaak toegepast: Tekstkleur: Tekst 1

1480

Pritchard, H.D.: Asia's shrinking glaciers protect large populations from drought stress. *Nature*, 569, 649–654, <https://doi.org/10.1038/s41586-019-1240-1>, 2019

heeft opmaak toegepast: Tekstkleur: Tekst 1

[RGI Consortium: Randolph Glacier Inventory - A Dataset of Global Glacier Outlines, Version 6. Boulder, Colorado USA.](#) [NSIDC: National Snow and Ice Data Center, https://doi.org/10.7265/4m1f-gd79, 2017](#)

heeft opmaak toegepast: Lettertype: (Standaard) +Hoofddekt (Times New Roman), Geen spelling- of grammaticacontrole uitvoeren

Met opmaak: Uitvullen

1485

Satylkanov, R.: Ablation of Ice and Snow of Kara-Batkak Glacier and its Impact on River Flow. *Journal of Climate Change*, 4(2), 1–14, <https://doi.org/10.3233/jcc-180009>, 2018

heeft opmaak toegepast: Lettertype: (Standaard) +Hoofddekt (Times New Roman), 10 pt, Tekstkleur: Tekst 1, Engels (Groot-Brittannië), Geen spelling- of grammaticacontrole uitvoeren

1490

Savoskul, O. S. and Solomina, O. N.: Late-Holocene glacier variations in the frontal and inner ranges of Tian Shan, central Asia. *Holocene*, 6(1), 25–3, <https://doi.org/10.1177/095968369600600>, 1996

heeft opmaak toegepast: Lettertype: (Standaard) +Hoofddekt (Times New Roman), Geen spelling- of grammaticacontrole uitvoeren

Shahgedanova, M., Afzal, M., Hagg, W., Kapitsa, V., Kasatkin, N., Mayr, E., Rybak, O., Saidaliyeva, Z., Severskiy, I., Usmanova, Z., Wade, A., Yaitskaya, N., and Zhumabayev, D.: Emptying Water Towers? Impacts of Future Climate and Glacier Change on River Discharge in the Northern Tien Shan, Central Asia, *Water*, 12, 627, <https://doi.org/10.3390/w12030627>, 2020

heeft opmaak toegepast: Lettertype: (Standaard) +Hoofddekt (Times New Roman), Tekstkleur: Tekst 1, Geen spelling- of grammaticacontrole uitvoeren

heeft opmaak toegepast: Tekstkleur: Tekst 1

1495



1545

Zekollari, H., Huybrechts, P., Fürst, J. J., Rybak, O., and Eisen, O.: Calibration of a higher-order 3-D ice-flow model of the Morteratsch glacier complex, Engadin, Switzerland, *Annals of Glaciology*, 54, 343–351, <https://doi.org/10.3189/2013AoG63A434>, 2013

1550

Zekollari, H., Fürst, J., and Huybrechts, P.: Modelling the evolution of Vadret da Morteratsch, Switzerland, since the Little Ice Age and into the future, *Journal of Glaciology*, 60, 1155–1168, <https://doi.org/10.3189/2014JoG14J053>, 2014

1555

Zekollari, H. and Huybrechts, P.: On the climate–geometry imbalance, response time and volume–area scaling of an alpine glacier: insights from a 3-D flow model applied to Vadret da Morteratsch, Switzerland, *Annals of Glaciology*, 56, 51–62, <https://doi.org/10.3189/2015AoG70A921>, 2015

Zekollari, H., Huybrechts, P., Noël, B., van de Berg, W. J., and van den Broeke, M. R.: Sensitivity, stability and future evolution of the world's northernmost ice cap, Hans Tausen Iskappe (Greenland), *The Cryosphere*, 11, 805–825, <https://doi.org/10.5194/tc-11-805-2017>, 2017

heeft verwijderd: .

heeft verwijderd: .

heeft verwijderd: .

heeft verwijderd: .

heeft verwijderd: n.

heeft verwijderd: .

32

|   |                                      |                   |                     |
|---|--------------------------------------|-------------------|---------------------|
| ▲ | Pagina 4: [1] heeft opmaak toegepast | Lander Van Tricht | 12-05-2023 11:22:00 |
|   | Lettertype: 9 pt                     |                   |                     |
| ▲ | Pagina 4: [1] heeft opmaak toegepast | Lander Van Tricht | 12-05-2023 11:22:00 |
|   | Lettertype: 9 pt                     |                   |                     |
| ▲ | Pagina 4: [2] heeft opmaak toegepast | Lander Van Tricht | 12-05-2023 11:22:00 |
|   | Lettertype: 9 pt                     |                   |                     |
| ▲ | Pagina 4: [2] heeft opmaak toegepast | Lander Van Tricht | 12-05-2023 11:22:00 |
|   | Lettertype: 9 pt                     |                   |                     |
| ▲ | Pagina 4: [2] heeft opmaak toegepast | Lander Van Tricht | 12-05-2023 11:22:00 |
|   | Lettertype: 9 pt                     |                   |                     |
| ▲ | Pagina 4: [3] heeft verwijderd       | Lander Van Tricht | 11-04-2023 17:20:00 |
| ✖ |                                      |                   |                     |
| ▲ | Pagina 4: [3] heeft verwijderd       | Lander Van Tricht | 11-04-2023 17:20:00 |
| ✖ |                                      |                   |                     |
| ▲ | Pagina 4: [4] heeft opmaak toegepast | Lander Van Tricht | 12-05-2023 11:22:00 |
|   | Lettertype: 9 pt                     |                   |                     |
| ▲ | Pagina 4: [4] heeft opmaak toegepast | Lander Van Tricht | 12-05-2023 11:22:00 |
|   | Lettertype: 9 pt                     |                   |                     |
| ▲ | Pagina 4: [4] heeft opmaak toegepast | Lander Van Tricht | 12-05-2023 11:22:00 |
|   | Lettertype: 9 pt                     |                   |                     |
| ▲ | Pagina 4: [4] heeft opmaak toegepast | Lander Van Tricht | 12-05-2023 11:22:00 |
|   | Lettertype: 9 pt                     |                   |                     |
| ▲ | Pagina 4: [4] heeft opmaak toegepast | Lander Van Tricht | 12-05-2023 11:22:00 |
|   | Lettertype: 9 pt                     |                   |                     |
| ▲ | Pagina 4: [4] heeft opmaak toegepast | Lander Van Tricht | 12-05-2023 11:22:00 |
|   | Lettertype: 9 pt                     |                   |                     |
| ▲ | Pagina 4: [4] heeft opmaak toegepast | Lander Van Tricht | 12-05-2023 11:22:00 |
|   | Lettertype: 9 pt                     |                   |                     |
| ▲ | Pagina 4: [4] heeft opmaak toegepast | Lander Van Tricht | 12-05-2023 11:22:00 |
|   | Lettertype: 9 pt                     |                   |                     |
| ▲ | Pagina 4: [4] heeft opmaak toegepast | Lander Van Tricht | 12-05-2023 11:22:00 |
|   | Lettertype: 9 pt                     |                   |                     |
| ▲ | Pagina 4: [5] heeft verwijderd       | Lander Van Tricht | 11-04-2023 16:05:00 |
| ▼ |                                      |                   |                     |
| ▲ | Pagina 4: [5] heeft verwijderd       | Lander Van Tricht | 11-04-2023 16:05:00 |
| ▼ |                                      |                   |                     |
| ▲ | Pagina 11: [6] heeft verwijderd      | Lander Van Tricht | 14-04-2023 16:09:00 |

▼  
▲  
**Pagina 11: [6] heeft verwijderd**    **Lander Van Tricht**    **14-04-2023 16:09:00**

▼  
▲  
**Pagina 11: [6] heeft verwijderd**    **Lander Van Tricht**    **14-04-2023 16:09:00**

▼  
▲  
**Pagina 11: [6] heeft verwijderd**    **Lander Van Tricht**    **14-04-2023 16:09:00**

▼  
▲  
**Pagina 11: [6] heeft verwijderd**    **Lander Van Tricht**    **14-04-2023 16:09:00**

▼  
▲  
**Pagina 11: [6] heeft verwijderd**    **Lander Van Tricht**    **14-04-2023 16:09:00**

▼  
▲  
**Pagina 11: [6] heeft verwijderd**    **Lander Van Tricht**    **14-04-2023 16:09:00**

▼  
▲  
**Pagina 11: [7] heeft verwijderd**    **Lander Van Tricht**    **11-04-2023 09:00:00**

▼  
▲  
**Pagina 11: [7] heeft verwijderd**    **Lander Van Tricht**    **11-04-2023 09:00:00**

▼  
▲  
**Pagina 11: [7] heeft verwijderd**    **Lander Van Tricht**    **11-04-2023 09:00:00**

▼  
▲  
**Pagina 11: [7] heeft verwijderd**    **Lander Van Tricht**    **11-04-2023 09:00:00**

▼  
▲  
**Pagina 11: [8] heeft opmaak toegepast**    **Lander Van Tricht**    **09-06-2023 11:16:00**

Lettertype: 9 pt, Niet Cursief

▲  
**Pagina 11: [8] heeft opmaak toegepast**    **Lander Van Tricht**    **09-06-2023 11:16:00**

Lettertype: 9 pt, Niet Cursief

▲  
**Pagina 11: [9] heeft opmaak toegepast**    **Lander Van Tricht**    **09-06-2023 11:16:00**

Lettertype: 9 pt, Niet Cursief

▲  
**Pagina 11: [9] heeft opmaak toegepast**    **Lander Van Tricht**    **09-06-2023 11:16:00**

Lettertype: 9 pt, Niet Cursief

▲  
**Pagina 11: [10] heeft opmaak toegepast**    **Lander Van Tricht**    **09-06-2023 11:16:00**

Lettertype: 9 pt, Niet Cursief

▲  
**Pagina 11: [10] heeft opmaak toegepast**    **Lander Van Tricht**    **09-06-2023 11:16:00**

Lettertype: 9 pt, Niet Cursief

▲  
**Pagina 11: [11] heeft opmaak toegepast**    **Lander Van Tricht**    **09-06-2023 11:16:00**

Lettertype: 9 pt, Niet Cursief

▲  
**Pagina 11: [11] heeft opmaak toegepast**    **Lander Van Tricht**    **09-06-2023 11:16:00**



Lettertype: 9 pt, Niet Cursief

▲  
**Pagina 11: [12] heeft opmaak toegepast** Lander Van Tricht 09-06-2023 11:16:00

Lettertype: 9 pt, Niet Cursief

▲  
**Pagina 11: [12] heeft opmaak toegepast** Lander Van Tricht 09-06-2023 11:16:00

Lettertype: 9 pt, Niet Cursief

▲  
**Pagina 11: [13] heeft opmaak toegepast** Lander Van Tricht 09-06-2023 11:16:00

Lettertype: 9 pt, Niet Cursief

▲  
**Pagina 11: [13] heeft opmaak toegepast** Lander Van Tricht 09-06-2023 11:16:00

Lettertype: 9 pt, Niet Cursief

▲  
**Pagina 11: [14] heeft opmaak toegepast** Lander Van Tricht 09-06-2023 11:16:00

Lettertype: 9 pt, Niet Cursief

▲  
**Pagina 11: [14] heeft opmaak toegepast** Lander Van Tricht 09-06-2023 11:16:00

Lettertype: 9 pt, Niet Cursief

▲  
**Pagina 11: [15] heeft opmaak toegepast** Lander Van Tricht 09-06-2023 11:16:00

Lettertype: 9 pt, Niet Cursief

▲  
**Pagina 11: [15] heeft opmaak toegepast** Lander Van Tricht 09-06-2023 11:16:00

Lettertype: 9 pt, Niet Cursief

▲  
**Pagina 11: [16] heeft verwijderd** Lander Van Tricht 22-05-2023 18:30:00

x  
▲  
**Pagina 11: [16] heeft verwijderd** Lander Van Tricht 22-05-2023 18:30:00

x  
▲  
**Pagina 11: [17] heeft verwijderd** Lander Van Tricht 22-05-2023 18:30:00

x  
▲  
**Pagina 11: [17] heeft verwijderd** Lander Van Tricht 22-05-2023 18:30:00

x  
▲  
**Pagina 11: [18] heeft verwijderd** Lander Van Tricht 22-05-2023 18:30:00

x  
▲  
**Pagina 11: [18] heeft verwijderd** Lander Van Tricht 22-05-2023 18:30:00

x  
▲  
**Pagina 11: [19] heeft opmaak toegepast** Lander Van Tricht 09-06-2023 11:16:00

Lettertype: 9 pt, Niet Cursief, Engels (V.S.)

▲  
**Pagina 11: [19] heeft opmaak toegepast** Lander Van Tricht 09-06-2023 11:16:00

Lettertype: 9 pt, Niet Cursief, Engels (V.S.)

▲  
**Pagina 11: [20] heeft verwijderd** Lander Van Tricht 22-05-2023 18:30:00

x  
▲  
**Pagina 11: [20] heeft verwijderd** Lander Van Tricht 22-05-2023 18:30:00

x  
▲  
**Pagina 11: [21] heeft verwijderd** Lander Van Tricht 22-05-2023 18:30:00

x  
▲

Pagina 11: [21] heeft verwijderd Lander Van Tricht 22-05-2023 18:30:00

Pagina 11: [22] heeft verwijderd Lander Van Tricht 14-04-2023 14:39:00

Pagina 11: [22] heeft verwijderd Lander Van Tricht 14-04-2023 14:39:00

Pagina 11: [22] heeft verwijderd Lander Van Tricht 14-04-2023 14:39:00

Pagina 11: [22] heeft verwijderd Lander Van Tricht 14-04-2023 14:39:00

Pagina 11: [22] heeft verwijderd Lander Van Tricht 14-04-2023 14:39:00

Pagina 11: [22] heeft verwijderd Lander Van Tricht 14-04-2023 14:39:00

Pagina 11: [22] heeft verwijderd Lander Van Tricht 14-04-2023 14:39:00

Pagina 11: [22] heeft verwijderd Lander Van Tricht 14-04-2023 14:39:00

Pagina 11: [22] heeft verwijderd Lander Van Tricht 14-04-2023 14:39:00

Pagina 11: [22] heeft verwijderd Lander Van Tricht 14-04-2023 14:39:00

Pagina 12: [23] heeft verwijderd Lander Van Tricht 12-04-2023 11:58:00

Pagina 12: [23] heeft verwijderd Lander Van Tricht 12-04-2023 11:58:00

Pagina 12: [23] heeft verwijderd Lander Van Tricht 12-04-2023 11:58:00

Pagina 12: [23] heeft verwijderd Lander Van Tricht 12-04-2023 11:58:00

Pagina 12: [24] heeft verwijderd Lander Van Tricht 14-04-2023 14:39:00

Pagina 12: [24] heeft verwijderd Lander Van Tricht 14-04-2023 14:39:00

Pagina 12: [24] heeft verwijderd Lander Van Tricht 14-04-2023 14:39:00

Pagina 12: [24] heeft verwijderd Lander Van Tricht 14-04-2023 14:39:00

▼  
**Pagina 12: [25] heeft opmaak toegepast** Lander Van Tricht 09-06-2023 11:16:00

Lettertype: 9 pt, Niet Cursief

▲  
**Pagina 12: [25] heeft opmaak toegepast** Lander Van Tricht 09-06-2023 11:16:00

Lettertype: 9 pt, Niet Cursief

▲  
**Pagina 12: [26] heeft opmaak toegepast** Lander Van Tricht 09-06-2023 11:16:00

Lettertype: 9 pt, Niet Cursief

▲  
**Pagina 12: [26] heeft opmaak toegepast** Lander Van Tricht 09-06-2023 11:16:00

Lettertype: 9 pt, Niet Cursief

▲  
**Pagina 12: [27] heeft opmaak toegepast** Lander Van Tricht 09-06-2023 11:16:00

Lettertype: 9 pt, Niet Cursief

▲  
**Pagina 12: [27] heeft opmaak toegepast** Lander Van Tricht 09-06-2023 11:16:00

Lettertype: 9 pt, Niet Cursief

▲  
**Pagina 12: [28] heeft opmaak toegepast** Lander Van Tricht 09-06-2023 11:16:00

Lettertype: 9 pt, Niet Cursief

▲  
**Pagina 12: [28] heeft opmaak toegepast** Lander Van Tricht 09-06-2023 11:16:00

Lettertype: 9 pt, Niet Cursief

▲  
**Pagina 12: [29] heeft opmaak toegepast** Lander Van Tricht 09-06-2023 11:16:00

Lettertype: 9 pt, Niet Cursief

▲  
**Pagina 12: [29] heeft opmaak toegepast** Lander Van Tricht 09-06-2023 11:16:00

Lettertype: 9 pt, Niet Cursief

▲  
**Pagina 12: [30] heeft opmaak toegepast** Lander Van Tricht 09-06-2023 11:16:00

Lettertype: 9 pt, Niet Cursief

▲  
**Pagina 12: [30] heeft opmaak toegepast** Lander Van Tricht 09-06-2023 11:16:00

Lettertype: 9 pt, Niet Cursief

▲  
**Pagina 12: [31] heeft opmaak toegepast** Lander Van Tricht 09-06-2023 11:16:00

Lettertype: 9 pt, Niet Cursief

▲  
**Pagina 12: [31] heeft opmaak toegepast** Lander Van Tricht 09-06-2023 11:16:00

Lettertype: 9 pt, Niet Cursief

▲  
**Pagina 12: [32] heeft verwijderd** Lander Van Tricht 12-04-2023 12:02:00

▲  
**Pagina 12: [32] heeft verwijderd** Lander Van Tricht 12-04-2023 12:02:00

▲  
**Pagina 12: [33] heeft opmaak toegepast** Lander Van Tricht 09-06-2023 11:16:00

Lettertype: 9 pt, Niet Cursief

▲  
**Pagina 12: [33] heeft opmaak toegepast** Lander Van Tricht 09-06-2023 11:16:00

Lettertype: 9 pt, Niet Cursief

▲

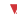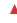

Supplement: Supplementary file [file egusphere-2022-1441-AC1-supplement.zip]
